# Supplementary material
Source: HighWire-hosted journal article supplement (doi:10.1101/rna.079866.123)
Supplement: Supplemental_Table_S3.xlsx [file Supplemental_Table_S3.xlsx]

## Sheet: 3.1 rRNA_depletn_oligos
Name	Sequence
AdditionalProbe_1	ACAAATCAGACAACAAAGGCTTAATCTCAGCAGATCGTAACAACAAGGCT
AdditionalProbe_2	ATACCCCGTTGTACATCTAAGTCGTATACAAATGATTTATCCCCACGCAA
AdditionalProbe_3	CGCCAGCAAGCACCCAAGGCCTTTCCGCCAAGTGCACCGTTGCTAGCCTG
AdditionalProbe_4	GCCACAAGGACGCCTTATTCGTATCCATCTATATTGTGTGGAGCAAAGAA
AdditionalProbe_5	CATGGATTCTGACTTAGAGGCGTTCAGCCATAATCCAGCGGATGGTAGCT
AdditionalProbe_6	ATCAGACAGCCGCAAAAACCAATTATCCGAATGAACTGTTCCTCTCGTAC
AdditionalProbe_7	TTGCGGTAACATTCATCAGTAGGGTAAAACTAACCTGTCTCACGACGGTC
AdditionalProbe_8	TTCCCTATTAGTGGGTGAACAATCCAACGCTTACCGAATTCTGCTTCGGT
AdditionalProbe_9	GACATCGAAGAATCAAAAAGCAATGTCGCTATGAACGCTTGACTGCCACA
AdditionalProbe_10	TGGTAACTTTTCTGGCACCTCTAGCCTCAAATTCCGAGGGACTAAAGGAT
AdditionalProbe_11	TCATGGTTTGTATTCACACTGAAAATCAAAATCAAGGGGGCTTTTACCCT
AdditionalProbe_12	ATTTCTGTTCTCCATGAGCCCCCCTTAGGACATCTGCGTTATCGTTTAAC
AdditionalProbe_13	GCCAAACTCCCCACCTGACAATGTCTTCAACCCGGATCAGCCCCGAATGG
AdditionalProbe_14	AACGTGGAAAATGAATTCCAGCTCCGCTTCATTGAATAAGTAAAGAAACT
AdditionalProbe_15	TTTCACTGGCGCCGAAGCTCCCACTTATTCTACACCCTCTATGTCTCTTC
AdditionalProbe_16	AGTCAAGCTCAACAGGGTCTTCTTTCCCCGCTGATTCTGCCAAGCCCGTT
AdditionalProbe_17	TCGCTAGATAGTAGATAGGGACAGTGGGAATCTCGTTAATCCATTCATGC
AdditionalProbe_18	TGACGAGGCATTTGGCTACCTTAAGAGAGTCATAGTTACTCCCGCCGTTT
AdditionalProbe_19	AATTTCTTCACTTTGACATTCAGAGCACTGGGCAGAAATCACATTGCGTC
AdditionalProbe_20	CCATCGCAATGCTATGTTTTAATTAGACAGTCAGATTCCCCTTGTCCGTA
AdditionalProbe_21	TCGTTAATTGTAGCAAGCGACGGTCTACAAGAGACCTACCAAGGCCGTCT
AdditionalProbe_22	AGTAGTCCGCCTAGCAGAGCAAGCCCCACCAAGCAGTCCACAAGCACGCC
AdditionalProbe_23	AGGCCCTCACTACCCGACCCTTAGAGCCAATCCTTATCCCGAAGTTACGG
AdditionalProbe_24	TTCCCTTATCTACATTATTCTATCAACTAGAGGCTGTTCACCTTGGAGAC
AdditionalProbe_25	GTACGACCTGGCATGAAAACTATTCCTTCCTGTGGATTTTCACGGGCCGT
AdditionalProbe_26	GCCAGCAAAGGTGCTGGCCTCTTCCAGCCATAAGACCCCATCTCCGGATA
AdditionalProbe_27	GATAAGCTGTTAAGAAGAAAAGATAACTCCTCCCAGGGCTCGCGCCGACG
AdditionalProbe_28	ACGTTACCGTGAAGAATCCATATCCAGGTTCCGGAATCTTAACCGGATTC
AdditionalProbe_29	CTGCATAAAATCAGGCCTTTGAAACGGAGCTTCCCCATCTCTTAGGATCG
AdditionalProbe_30	ACTGCTGTTGACGTGGAACCTTTCCCCACTTCAGTCTTCAAAGTTCTCAT
AdditionalProbe_31	TACCACCAAGATCTGCACTAGAGGCCGTTCGACCCGACCTTACGGTCTAG
AdditionalProbe_32	TCCACGCCTGCCTACTCGTCAGGGCATCATATCAACCCTGACGGTAGAGT
AdditionalProbe_33	GAGCGCCATCCATTTTCAGGGCTAGTTCATTCGGCCGGTGAGTTGTTACA
AdditionalProbe_34	TCCGACTTCCATGGCCACCGTCCGGCTGTCTAGATGAACTAACACCTTTT
AdditionalProbe_35	CGTGTATTCCGGCACCTTAACTCTACGTTCGGTTCATCCCGCATCGCCAG
AdditionalProbe_36	ATGGCCCACTAAAAGCTCTTCATTCAAATGTCCACGTTCAATTAAGTAAC
AdditionalProbe_37	ATTTAAAGTTTGAGAATAGGTCAAGGTCATTTCGACCCCGGAACCTCTAA
AdditionalProbe_38	CATAAAACTGATACGAGCTTCTGCTATCCTGAGGGAAACTTCGGCAGGAA
AdditionalProbe_39	TTCGATTAGTCTTTCGCCCCTATACCCAAATTCGACGATCGATTTGCACG
AdditionalProbe_40	GCCTCCACCAGAGTTTCCTCTGGCTTCACCCTATTCAGGCATAGTTCACC
AdditionalProbe_41	ACAGCTATGCTCTTACTCAAATCCATCCGAAGACATCAGGATCGGTCGAT
AdditionalProbe_42	AGGCCCCAACCTACGTTCACTTTCATTACGCGTATGGGTTTTACACCCAA
AdditionalProbe_43	TTAGACTCCTTGGTCCGTGTTTCAAGACGGGCGGCATATAACCATTATGC
AdditionalProbe_44	ACGTCGCAGTCCTCAGTCCCAGCTGGCAGTATTCCCACAGGCTATAATAC
AdditionalProbe_45	ACATTCCTATGGATTTATCCTGCCACCAAAACTGATGCTGGCCCAGTGAA
AdditionalProbe_46	ACCCACAAGGAGCAGAGGGCACAAAACACCATGTCTGATCAAATGCCCTT
AdditionalProbe_47	CACGTACTTTTTCACTCTCTTTTCAAAGTTCTTTTCATCTTTCCATCACT
AdditionalProbe_48	CGGTCTCTCGCCAATATTTAGCTTTAGATGGAATTTACCACCCACTTAGA
AdditionalProbe_49	AACTCGACTCTTCGAAGGCACTTTACAAAGAACCGCACTCCTCGCCACAC
AdditionalProbe_50	TATGACGTCCTGTTCCAAGGAACATAGACAAGGAACGGCCCCAAAGTTGC
AdditionalProbe_51	ACTCGGGCACCGAAGGTACCAGATTTCAAATTTGAGCTTTTGCCGCTTCA
AdditionalProbe_52	GCAATCCCGGTTGGTTTCTTTTCCTCCGCTTATTGATATGCTTAAGTTCA
AdditionalProbe_53	TAATGATCCTTCCGCAGGTTCACCTACGGAAACCTTGTTACGACTTTTAG
AdditionalProbe_54	AAGTTTGTCCAAATTCTCCGCTCTGAGATGGAGTTGCCCCCTTCTCTAAG
AdditionalProbe_55	CACTAAGCCATTCAATCGGTACTAGCGACGGGCGGTGTGTACAAAGGGCA
AdditionalProbe_56	CAAGCTGATGACTTGCGCTTACTAGGAATTCCTCGTTGAAGAGCAATAAT
AdditionalProbe_57	CCAGCACGACGGAGTTTCACAAGATTACCAAGACCTCTCGGCCAAGGTTA
AdditionalProbe_58	TCAGTGTAGCGCGCGTGCGGCCCAGAACGTCTAAGGGCATCACAGACCTG
AdditionalProbe_59	TCCATCGGCTTGAAACCGATAGTCCCTCTAAGAAGTGGATAACCAGCAAA
AdditionalProbe_60	TTAGTAGGTTAAGGTCTCGTTCGTTATCGCAATTAAGCAGACAAATCACT
AdditionalProbe_61	GGCCATGCACCACCACCCACAAAATCAAGAAAGAGCTCTCAATCTGTCAA
AdditionalProbe_62	GACCTGGTGAGTTTCCCCGTGTTGAGTCAAATTAAGCCGCAGGCTCCACT
AdditionalProbe_63	CCGTCAATTCCTTTAAGTTTCAGCCTTGCGACCATACTCCCCCCAGAACC
AdditionalProbe_64	CTCGTAAGGTGCCGAGTGGGTCATTAAAAAAACACCACCCGATCCCTAGT
AdditionalProbe_65	TTAAGACTACGACGGTATCTGATCATCTTCGATCCCCTAACTTTCGTTCT
AdditionalProbe_66	TCCTTGGCAAATGCTTTCGCAGTAGTTAGTCTTCAATAAATCCAAGAATT
AdditionalProbe_67	GAATACTGATGCCCCCGACCGTCCCTATTAATCATTACGATGGTCCTAGA
AdditionalProbe_68	ACCAAACGTCCTATTCTATTATTCCATGCTAATATATTCGAGCAATACGC
AdditionalProbe_69	TAATTTTTTCAAAGTAAAAGTCCTGGTTCGCCAAGAGCCACAAGGACTCA
AdditionalProbe_70	AAAGGCCCCGTTGGAAATCCAGTACACGAAAAAATCGGACCGGCCAACCG
AdditionalProbe_71	TACGAGCTTTTTAACTGCAACAACTTTAATATACGCTATTGGAGCTGGAA
AdditionalProbe_72	GCACCAGACTTGCCCTCCAATTGTTCCTCGTTAAGGTATTTACATTGTAC
AdditionalProbe_73	GACCCGAATGGGCCCTGTATCGTTATTTATTGTCACTACCTCCCTGAATT
AdditionalProbe_74	GCGCGCCTGCTGCCTTCCTTGGATGTGGTAGCCGTTTCTCAGGCTCCCTC
AdditionalProbe_75	TTATTCCCCGTTACCCGTTGAAACCATGGTAGGCCACTATCCTACCATCG
AdditionalProbe_76	GAAATTTGAATGAACCATCGCCAGCACAAGGCCATGCGATTCGAAAAGTT
AdditionalProbe_77	AGAGTCCGAAGACATTGATTTTTTATCTAATAAATACATCTCTTCCAAAG
AdditionalProbe_78	CATGTATTAGCTCTAGAATTACCACAGTTATACCATGTAGTAAAGGAACT
AdditionalProbe_79	ACTGATTTAATGAGCCATTCGCAGTTTCACTGTATAAATTGCTTATACTT
AdditionalProbe_80	AAATGACGCTCAAACAGGCATGCCCCCTGGAATACCAAGGGGCGCAATGT
AdditionalProbe_81	ATGATTCACGGAATTCTGCAATTCACATTACGTATCGCATTTCGCTGCGT
AdditionalProbe_82	AGATTGCAGCACCTGAGTTTCGCGTATGGTCACCCACTACACTACTCGGT
AdditionalProbe_83	TTAACTACAGTTGATCGGACGGGAAACGGTGCTTTCTGGTAGATATGGCC

## Sheet: 3.2 JuncCts Single Intron
symbol	25_ijc_min	31_ijc_min	25_ijc_max	31_ijc_max	25_ejc	31_ejc	p_min_25	p_min_31	SE_25	%SE_25	SE_31	%SE_31	Ave_SE	%Ave_SE	27_ijc_min	33_ijc_min	27_ijc_max	33_ijc_max	27_ejc	33_ejc	p_min_27	p_min_33	SE_27	%SE_27	SE_33	%SE_33	Ave_SE	%Ave_SE	26_ijc_min	32_ijc_min	26_ijc_max	32_ijc_max	26_ejc	32_ejc	p_min_26	p_min_32	SE_26	%SE_26	SE_32	%SE_32	Ave_SE	%Ave_SE	28_ijc_min	34_ijc_min	28_ijc_max	34_ijc_max	28_ejc	34_ejc	p_min_28
ACT1	238	299	447	622	10201	10442	0.347445	0.324647	0.964599	96.4599	0.952812	95.2812	0.958705	95.8705	1118	821	1949	1391	6994	6237	0.364526	0.371157	0.809483	80.9483	0.840969	84.0969	0.825226	82.5226	2030	1778	2903	2775	3801	3719	0.411514	0.390512	0.599078	59.9078	0.609207	60.9207	0.604142	60.4142	1745	2105	2785	3032	2712	3335	0.38521
AIM11	35	29	78	70	309	313	0.309735	0.292929	0.826908	82.6908	0.843689	84.3689	0.835298	83.5298	442	319	530	361	115	95	0.454733	0.469118	0.190088	19.0088	0.217742	21.7742	0.203915	20.3915	635	546	722	584	9	15	0.467944	0.483186	0.013038	1.3038	0.0258336	2.58336	0.0194358	1.94358	549	571	589	679	0	5	0.482425
APE2	56	90	1306	1611	394	423	0.041116	0.0529101	0.23899	23.899	0.216532	21.6532	0.227761	22.7761	343	259	1450	1165	144	125	0.191299	0.181882	0.104179	10.4179	0.11109	11.109	0.107635	10.7635	442	401	1439	1442	21	17	0.234981	0.21758	0.0171327	1.71327	0.0137931	1.37931	0.0154629	1.54629	400	448	1273	1576	7	17	0.239091
APS3	13	22	38	65	681	791	0.254902	0.252874	0.955619	95.5619	0.935955	93.5955	0.945787	94.5787	275	152	366	223	314	267	0.429017	0.405333	0.489891	48.9891	0.578898	57.8898	0.534394	53.4394	386	369	557	507	33	40	0.409332	0.421233	0.063461	6.3461	0.0818214	8.18214	0.0726412	7.26412	393	416	533	566	4	7	0.424406
ARF2	77	117	81	138	1795	2218	0.487342	0.458824	0.957818	95.7818	0.945292	94.5292	0.951555	95.1555	537	395	703	421	872	806	0.433065	0.484069	0.58013	58.013	0.663694	66.3694	0.621912	62.1912	600	615	971	864	132	133	0.381922	0.415822	0.137313	13.7313	0.148859	14.8859	0.143086	14.3086	554	610	852	836	56	68	0.394026
ARP2	31	60	107	129	1911	2009	0.224638	0.31746	0.955057	95.5057	0.94939	94.939	0.952224	95.2224	540	347	648	417	824	768	0.454545	0.454188	0.579095	57.9095	0.665969	66.5969	0.622532	62.2532	748	722	867	743	92	95	0.463158	0.492833	0.101783	10.1783	0.114783	11.4783	0.108283	10.8283	694	747	715	777	15	20	0.492548
ARP9	47	40	56	57	1048	1155	0.456311	0.412371	0.95282	95.282	0.958514	95.8514	0.955667	95.5667	434	294	444	304	562	467	0.494305	0.491639	0.561407	56.1407	0.609594	60.9594	0.5855	58.55	714	640	739	652	76	71	0.491397	0.495356	0.0946787	9.46787	0.099016	9.9016	0.0968473	9.68473	628	671	677	766	14	13	0.481226
ASC1	460	502	515	674	17183	15682	0.471795	0.426871	0.972326	97.2326	0.963115	96.3115	0.967721	96.7721	2911	2166	3354	2349	8728	7988	0.464645	0.479734	0.734918	73.4918	0.779377	77.9377	0.757147	75.7147	4346	4016	5169	4621	6102	5536	0.456752	0.464976	0.560069	56.0069	0.560568	56.0568	0.560319	56.0319	4521	5001	5350	5545	4845	5162	0.458008
BCK2	9	11	127	140	77	120	0.0661765	0.0728477	0.392474	39.2474	0.478846	47.8846	0.43566	43.566	21	29	334	261	0	28	0.0591549	0.1	0	0	0.105342	10.5342	0.0526712	5.26712	52	44	365	337	0	11	0.1247	0.115486	0	0	0.0350137	3.50137	0.0175069	1.75069	43	53	354	404	0	6	0.108312
BET1	4	13	20	32	198	266	0.166667	0.288889	0.919505	91.9505	0.909367	90.9367	0.914436	91.4436	91	49	127	78	106	92	0.417431	0.385827	0.4863	48.63	0.579305	57.9305	0.532802	53.2802	110	92	143	118	13	12	0.434783	0.438095	0.0917741	9.17741	0.101172	10.1172	0.0964732	9.64732	126	96	126	96	0	0	0.5
BET4	24	48	27	49	15	16	0.470588	0.494845	0.369565	36.9565	0.248042	24.8042	0.308804	30.8804	272	156	320	182	4	7	0.459459	0.461538	0.0132474	1.32474	0.039548	3.9548	0.0263977	2.63977	315	256	315	256	0	0	0.5	0.5	0	0	0	0	0	0	319	285	319	285	0	0	0.5
BIG1	42	45	42	50	445	457	0.5	0.473684	0.913758	91.3758	0.905611	90.5611	0.909684	90.9684	85	68	91	72	96	105	0.482955	0.485714	0.521449	52.1449	0.599804	59.9804	0.560627	56.0627	105	85	118	87	21	11	0.470852	0.494186	0.158039	15.8039	0.113388	11.3388	0.135714	13.5714	88	92	88	97	0	6	0.5
BMH2	139	244	310	420	2807	3369	0.309577	0.36747	0.916104	91.6104	0.904593	90.4593	0.910349	91.0349	936	640	1228	867	1521	1147	0.432532	0.424685	0.579937	57.9937	0.598145	59.8145	0.589041	58.9041	1291	1203	1738	1582	257	220	0.426213	0.431957	0.142423	14.2423	0.134286	13.4286	0.138355	13.8355	1151	1213	1521	1709	56	53	0.430763
BOS1	10	21	69	102	470	544	0.126582	0.170732	0.884237	88.4237	0.860527	86.0527	0.872382	87.2382	87	40	312	181	136	114	0.218045	0.180995	0.340904	34.0904	0.423038	42.3038	0.381971	38.1971	101	122	349	329	14	20	0.224444	0.27051	0.0455525	4.55525	0.0682584	6.82584	0.0569054	5.69054	110	101	300	337	4	10	0.268293
CGI121	10	20	34	36	484	536	0.227273	0.357143	0.944306	94.4306	0.946519	94.6519	0.945413	94.5413	279	185	439	288	176	200	0.388579	0.391121	0.318363	31.8363	0.446713	44.6713	0.382538	38.2538	368	361	566	551	15	23	0.394004	0.395833	0.0298218	2.98218	0.0461114	4.61114	0.0379666	3.79666	386	382	527	549	6	7	0.422782
CIN2	11	30	58	74	175	178	0.15942	0.288462	0.776028	77.6028	0.743812	74.3812	0.75992	75.992	34	26	82	51	17	25	0.293103	0.337662	0.200162	20.0162	0.37005	37.005	0.285106	28.5106	32	41	32	75	0	3	0.5	0.353448	0	0	0.0454664	4.54664	0.0227332	2.27332	36	45	36	78	0	3	0.5
CMC2	40	39	47	54	389	477	0.45977	0.419355	0.898837	89.8837	0.909074	90.9074	0.903955	90.3955	389	205	389	207	169	132	0.5	0.497573	0.302867	30.2867	0.390527	39.0527	0.346697	34.6697	481	446	512	473	38	31	0.484391	0.48531	0.0710302	7.10302	0.0631498	6.31498	0.06709	6.709	469	481	514	509	10	10	0.477111
CMC4	228	248	244	276	299	311	0.483051	0.473282	0.558595	55.8595	0.54205	54.205	0.550323	55.0323	475	322	499	348	27	30	0.48768	0.480597	0.052499	5.2499	0.0820783	8.20783	0.0672887	6.72887	463	443	463	443	0	0	0.5	0.5	0	0	0	0	0	0	381	449	381	449	0	0	0.5
CNB1	8	5	25	49	477	611	0.242424	0.0925926	0.958065	95.8065	0.931508	93.1508	0.944786	94.4786	46	24	242	155	227	210	0.159722	0.134078	0.518627	51.8627	0.604428	60.4428	0.561527	56.1527	55	56	264	250	30	24	0.172414	0.183007	0.116295	11.6295	0.10063	10.063	0.108462	10.8462	47	68	224	260	10	9	0.173432
COF1	68	119	252	312	2086	2254	0.2125	0.276102	0.90739	90.739	0.897039	89.7039	0.902215	90.2215	474	327	805	561	977	953	0.370602	0.368243	0.588792	58.8792	0.667446	66.7446	0.628119	62.8119	679	673	1058	888	348	334	0.390904	0.431134	0.276663	27.6663	0.295757	29.5757	0.28621	28.621	673	640	939	886	303	290	0.417494
COX4	14	48	66	102	1124	1434	0.175	0.32	0.951816	95.1816	0.944216	94.4216	0.948016	94.8016	247	192	354	268	434	368	0.410982	0.417391	0.583314	58.3314	0.608991	60.8991	0.596152	59.6152	301	312	428	390	62	62	0.412894	0.444444	0.141694	14.1694	0.148562	14.8562	0.145128	14.5128	248	310	340	470	11	9	0.421769
CPT1	35	47	45	66	1691	1668	0.4375	0.415929	0.976539	97.6539	0.966342	96.6342	0.971441	97.1441	249	166	275	172	637	522	0.475191	0.491124	0.708057	70.8057	0.755369	75.5369	0.731713	73.1713	370	326	381	357	61	61	0.492676	0.477306	0.139722	13.9722	0.151288	15.1288	0.145505	14.5505	298	327	325	345	17	19	0.478331
DBP2	72	71	617	751	3329	3243	0.104499	0.0863747	0.855994	85.5994	0.824087	82.4087	0.84004	84.004	810	507	1761	1253	2933	2538	0.315053	0.288068	0.667443	66.7443	0.709711	70.9711	0.688577	68.8577	952	1004	1874	1866	1026	904	0.336872	0.349826	0.39623	39.623	0.366222	36.6222	0.381226	38.1226	1055	975	1999	1760	305	343	0.345449
DID4	10	13	17	29	138	274	0.37037	0.309524	0.905468	90.5468	0.919316	91.9316	0.912392	91.2392	236	141	240	146	80	93	0.495798	0.491289	0.251559	25.1559	0.393162	39.3162	0.322361	32.2361	305	288	316	308	4	8	0.491143	0.483221	0.0127147	1.27147	0.0261152	2.61152	0.0194149	1.94149	263	302	268	307	0	2	0.495292
DTD1	12	22	24	29	1209	1273	0.333333	0.431373	0.983727	98.3727	0.979999	97.9999	0.981863	98.1863	138	86	196	91	685	578	0.413174	0.485876	0.799266	79.9266	0.867125	86.7125	0.833196	83.3196	235	161	344	292	143	149	0.405872	0.355408	0.322974	32.2974	0.377749	37.7749	0.350362	35.0362	222	221	343	355	36	60	0.39292
ECM33	484	586	541	604	8445	7841	0.472195	0.492437	0.942619	94.2619	0.929454	92.9454	0.936036	93.6036	1815	1483	2044	1635	4952	4735	0.470329	0.475625	0.718901	71.8901	0.751861	75.1861	0.735381	73.5381	2765	2708	3096	2942	1670	1540	0.471762	0.479292	0.362268	36.2268	0.352415	35.2415	0.357342	35.7342	2588	2889	2826	3114	738	831	0.47802
ECM9	44	52	59	73	284	296	0.427184	0.416	0.843751	84.3751	0.82162	82.162	0.832685	83.2685	218	151	235	176	50	41	0.481236	0.461774	0.180623	18.0623	0.199556	19.9556	0.19009	19.009	218	192	253	226	0	8	0.462845	0.45933	0	0	0.0366329	3.66329	0.0183165	1.83165	160	217	180	273	4	0	0.470588
EFB1	628	753	692	763	16521	15843	0.475758	0.496702	0.961499	96.1499	0.954338	95.4338	0.957918	95.7918	3278	2403	4326	3245	11131	9550	0.431089	0.42546	0.741809	74.1809	0.767885	76.7885	0.754847	75.4847	4489	4129	7048	6220	5941	5409	0.389096	0.398976	0.49536	49.536	0.501077	50.1077	0.498219	49.8219	4632	4544	6792	7005	3457	3592	0.405462
EPT1	21	19	27	24	771	747	0.4375	0.44186	0.969354	96.9354	0.971656	97.1656	0.970505	97.0505	254	191	260	194	184	197	0.494163	0.496104	0.4172	41.72	0.505761	50.5761	0.461481	46.1481	359	324	372	326	15	28	0.491108	0.498462	0.0394098	3.94098	0.0793194	7.93194	0.0593646	5.93646	336	355	336	378	0	5	0.5
ERD2	38	65	171	178	1798	1612	0.181818	0.26749	0.924508	92.4508	0.916027	91.6027	0.920267	92.0267	447	282	483	325	569	437	0.480645	0.46458	0.54992	54.992	0.58893	58.893	0.569425	56.9425	491	468	556	471	45	50	0.468959	0.498403	0.0788757	7.88757	0.0962455	9.62455	0.0875606	8.75606	451	480	481	484	5	14	0.483906
ERV1	26	27	31	33	666	822	0.45614	0.45	0.958661	95.8661	0.964449	96.4449	0.961555	96.1555	267	163	272	170	139	172	0.495362	0.489489	0.34025	34.025	0.508014	50.8014	0.424132	42.4132	369	273	390	281	18	18	0.486166	0.49278	0.0452499	4.52499	0.061005	6.1005	0.0531275	5.31275	301	300	302	330	4	14	0.499171
ERV41	8	15	135	147	677	707	0.0559441	0.0925926	0.841103	84.1103	0.839889	83.9889	0.840496	84.0496	205	130	405	280	185	171	0.336066	0.317073	0.353873	35.3873	0.423856	42.3856	0.388864	38.8864	303	243	546	456	15	20	0.35689	0.347639	0.0316272	3.16272	0.0497571	4.97571	0.0406921	4.06921	278	265	477	474	9	5	0.368212
FES1	66	74	752	843	198	190	0.0806846	0.0806979	0.221316	22.1316	0.195686	19.5686	0.208501	20.8501	246	178	1555	1079	17	23	0.136591	0.141607	0.0122021	1.22021	0.023604	2.3604	0.017903	1.7903	325	297	1988	1835	2	5	0.14051	0.139306	0.00113874	0.113874	0.00307551	0.307551	0.00210712	0.210712	299	368	299	368	0	0	0.5
GCR1	100	135	100	135	0	0	0.5	0.5	0	0	0	0	0	0	370	313	370	313	0	0	0.5	0.5	0	0	0	0	0	0	410	415	410	415	0	0	0.5	0.5	0	0	0	0	0	0	381	486	381	486	0	0	0.5
GIM4	189	203	212	223	316	461	0.471322	0.476526	0.61103	61.103	0.6835	68.35	0.647265	64.7265	376	267	655	428	201	140	0.364694	0.384173	0.26649	26.649	0.276599	27.6599	0.271544	27.1544	412	389	672	640	21	24	0.380074	0.378037	0.0353428	3.53428	0.0421709	4.21709	0.0387568	3.87568	427	398	708	714	7	0	0.376211
GIM5	14	28	72	96	599	689	0.162791	0.225806	0.905438	90.5438	0.895218	89.5218	0.900328	90.0328	210	118	391	204	236	184	0.349418	0.36646	0.418621	41.8621	0.516152	51.6152	0.467386	46.7386	290	265	535	464	26	28	0.351515	0.363512	0.0547508	5.47508	0.0667205	6.67205	0.0607357	6.07357	253	247	488	447	6	5	0.34143
GLC7	154	179	165	190	2713	2589	0.482759	0.485095	0.944411	94.4411	0.933422	93.3422	0.938917	93.8917	739	574	758	581	2401	2063	0.493654	0.49697	0.762314	76.2314	0.781285	78.1285	0.7718	77.18	1492	1410	1592	1463	1231	1122	0.483787	0.490776	0.443664	44.3664	0.438454	43.8454	0.441059	44.1059	1558	1782	1589	1881	484	549	0.495075
GOT1	32	35	105	114	1423	1390	0.233577	0.234899	0.941792	94.1792	0.935748	93.5748	0.93877	93.877	513	325	724	516	577	526	0.414713	0.386445	0.475486	47.5486	0.543282	54.3282	0.509384	50.9384	707	606	1054	876	117	119	0.401476	0.408907	0.113406	11.3406	0.134525	13.4525	0.123966	12.3966	637	712	934	1024	48	48	0.405474
GPI15	185	179	203	218	700	668	0.476804	0.450882	0.782632	78.2632	0.769217	76.9217	0.775925	77.5925	807	550	840	654	83	93	0.489982	0.456811	0.0915276	9.15276	0.132954	13.2954	0.112241	11.2241	941	804	1016	845	19	7	0.480838	0.487568	0.0190202	1.90202	0.00841336	0.841336	0.0137168	1.37168	858	849	910	906	6	5	0.485294
HAC1	9098	8288	9754	9142	0	0	0.482601	0.475502	0	0	0	0	0	0	9757	8109	10791	8843	0	0	0.474839	0.478351	0	0	0	0	0	0	10446	9559	11520	10294	0	0	0.475553	0.481489	0	0	0	0	0	0	9640	9844	10634	10765	0	0	0.475486
HNT1	282	289	322	349	3030	2943	0.466887	0.452978	0.909002	90.9002	0.901428	90.1428	0.905215	90.5215	1553	1112	1629	1150	844	790	0.488058	0.4916	0.346483	34.6483	0.411176	41.1176	0.378829	37.8829	1676	1545	1888	1632	268	252	0.470258	0.486308	0.130331	13.0331	0.136831	13.6831	0.133581	13.3581	1534	1732	1641	1801	158	185	0.48315
HNT2	94	96	116	138	464	434	0.447619	0.410256	0.813818	81.3818	0.782307	78.2307	0.798062	79.8062	236	184	314	252	56	65	0.429091	0.422018	0.166404	16.6404	0.225457	22.5457	0.195931	19.5931	262	247	374	341	9	6	0.41195	0.420068	0.0267172	2.67172	0.0195113	1.95113	0.0231143	2.31143	235	255	327	391	0	0	0.418149
HPC2	22	29	26	46	113	237	0.458333	0.386667	0.823815	82.3815	0.85737	85.737	0.840593	84.0593	208	156	223	181	58	52	0.482599	0.462908	0.211864	21.1864	0.23484	23.484	0.223352	22.3352	289	274	312	313	9	19	0.480865	0.46678	0.0290379	2.90379	0.060549	6.0549	0.0447934	4.47934	303	292	316	311	10	9	0.489499
HRB1	22	28	148	180	250	512	0.129412	0.134615	0.654975	65.4975	0.762428	76.2428	0.708702	70.8702	72	47	486	419	87	87	0.129032	0.100858	0.167443	16.7443	0.185707	18.5707	0.176575	17.6575	80	100	571	546	9	9	0.122888	0.154799	0.0173189	1.73189	0.0185201	1.85201	0.0179195	1.79195	89	88	550	527	0	4	0.13928
IMD4	232	270	326	380	3322	2930	0.415771	0.415385	0.920498	92.0498	0.897587	89.7587	0.909042	90.9042	2410	1648	3835	2619	2182	1933	0.385909	0.38622	0.399116	39.9116	0.462774	46.2774	0.430945	43.0945	4142	4087	6218	5657	651	602	0.399807	0.419438	0.107799	10.7799	0.107491	10.7491	0.107645	10.7645	4492	4627	6384	6490	125	176	0.413019
IST1	23	23	42	50	402	398	0.353846	0.315068	0.919326	91.9326	0.905589	90.5589	0.912457	91.2457	247	202	305	204	112	105	0.447464	0.497537	0.286411	28.6411	0.340904	34.0904	0.313657	31.3657	346	373	407	375	5	17	0.459495	0.498663	0.0130218	1.30218	0.043478	4.3478	0.0282499	2.82499	363	391	363	391	0	0	0.5
IWR1	21	44	38	54	34	50	0.355932	0.44898	0.515549	51.5549	0.502461	50.2461	0.509005	50.9005	171	94	218	116	7	8	0.439589	0.447619	0.0342567	3.42567	0.0700818	7.00818	0.0521693	5.21693	168	144	226	212	0	0	0.426396	0.404494	0	0	0	0	0	0	148	160	215	223	0	0	0.407713
KEI1	16	27	28	33	1055	900	0.363636	0.45	0.978087	97.8087	0.96743	96.743	0.972758	97.2758	418	261	511	308	396	342	0.449946	0.458699	0.457721	45.7721	0.544204	54.4204	0.500963	50.0963	568	476	771	629	86	76	0.424197	0.430769	0.11156	11.156	0.118919	11.8919	0.115239	11.5239	511	510	705	680	36	32	0.42023
KIN28	1	2	24	34	210	224	0.04	0.0555556	0.900978	90.0978	0.874241	87.4241	0.88761	88.761	31	21	167	104	53	65	0.156566	0.168	0.266724	26.6724	0.419203	41.9203	0.342964	34.2964	24	33	151	187	7	5	0.137143	0.15	0.0497927	4.97927	0.0296033	2.96033	0.039698	3.9698	34	38	34	185	0	6	0.5
LSB3	11	16	57	63	903	1087	0.161765	0.202532	0.947973	94.7973	0.953107	95.3107	0.95054	95.054	140	77	294	199	506	413	0.322581	0.278986	0.674377	67.4377	0.714578	71.4578	0.694477	69.4477	234	212	369	340	81	74	0.38806	0.384058	0.203716	20.3716	0.202828	20.2828	0.203272	20.3272	235	222	383	363	15	14	0.380259
LSM 2.00	43	67	194	227	2467	2297	0.181435	0.227891	0.936739	93.6739	0.923403	92.3403	0.930071	93.0071	361	219	382	275	1020	881	0.485868	0.44332	0.732866	73.2866	0.778837	77.8837	0.755851	75.5851	553	501	603	516	171	156	0.478374	0.492625	0.227975	22.7975	0.234724	23.4724	0.23135	23.135	510	538	562	625	23	21	0.475746
LSM 7.00	41	50	55	69	969	1020	0.427083	0.420168	0.951847	95.1847	0.943556	94.3556	0.947702	94.7702	579	359	645	368	622	453	0.473039	0.49381	0.503326	50.3326	0.554769	55.4769	0.529048	52.9048	990	899	1168	1024	97	116	0.458758	0.467499	0.0819713	8.19713	0.107252	10.7252	0.0946118	9.46118	1020	1036	1195	1209	14	17	0.460497
MAF 1.00	48	44	51	78	586	651	0.484848	0.360656	0.922043	92.2043	0.908282	90.8282	0.915162	91.5162	363	271	489	357	179	149	0.426056	0.431529	0.291381	29.1381	0.317773	31.7773	0.304577	30.4577	439	380	599	519	27	19	0.422929	0.422692	0.0483584	4.83584	0.0396456	3.96456	0.044002	4.4002	367	454	507	544	5	8	0.419908
MCM21	4	8	8	8	77	118	0.333333	0.5	0.920319	92.0319	0.936508	93.6508	0.928413	92.8413	90	47	91	50	25	21	0.497238	0.484536	0.216445	21.6445	0.301957	30.1957	0.259201	25.9201	109	109	112	114	0	0	0.493213	0.488789	0	0	0	0	0	0	105	102	114	107	0	0	0.479452
MCR1	37	61	269	272	109	95	0.120915	0.183183	0.311475	31.1475	0.289327	28.9327	0.300401	30.0401	180	139	435	327	15	20	0.292683	0.298283	0.039961	3.9961	0.0687468	6.87468	0.0543539	5.43539	191	176	191	411	0	3	0.5	0.29983	0	0	0.00873261	0.873261	0.0043663	0.43663	139	154	139	154	0	0	0.5
MMS2	6	13	17	31	217	260	0.26087	0.295455	0.938864	93.8864	0.910103	91.0103	0.924484	92.4484	60	38	77	55	49	46	0.437956	0.408602	0.413311	41.3311	0.489082	48.9082	0.451197	45.1197	79	91	104	91	3	0	0.431694	0.5	0.0311826	3.11826	0	0	0.0155913	1.55913	61	78	61	78	0	0	0.5
MOB1	23	48	37	68	159	251	0.383333	0.413793	0.834062	83.4062	0.80779	80.779	0.820926	82.0926	259	181	295	226	63	67	0.467509	0.444717	0.184659	18.4659	0.245432	24.5432	0.215046	21.5046	372	349	413	373	7	10	0.473885	0.48338	0.0174751	1.74751	0.0269252	2.69252	0.0222001	2.22001	312	352	363	396	0	0	0.462222
MOB2	43	66	91	110	593	698	0.320896	0.375	0.886932	88.6932	0.88187	88.187	0.884401	88.4401	532	370	594	383	220	208	0.472469	0.491368	0.280359	28.0359	0.355791	35.5791	0.318075	31.8075	741	629	812	776	32	28	0.477141	0.447687	0.0395002	3.95002	0.0379306	3.79306	0.0387154	3.87154	642	654	719	829	10	9	0.471712
MPT5	11	28	598	624	85	139	0.0180624	0.0429448	0.126413	12.6413	0.188499	18.8499	0.157456	15.7456	83	68	578	471	52	56	0.125567	0.12616	0.0915744	9.15744	0.117608	11.7608	0.104591	10.4591	128	142	623	603	17	21	0.170439	0.190604	0.0305958	3.05958	0.0391695	3.91695	0.0348826	3.48826	124	154	561	592	9	0	0.181022
MRM2	187	205	195	240	80	98	0.489529	0.460674	0.295112	29.5112	0.304465	30.4465	0.299788	29.9788	311	275	340	277	4	4	0.477727	0.498188	0.0121159	1.21159	0.0142855	1.42855	0.0132007	1.32007	382	312	382	342	0	2	0.5	0.477064	0	0	0.00606634	0.606634	0.00303317	0.303317	305	350	305	350	0	0	0.5
MRPL44	32	49	125	145	569	738	0.203822	0.252577	0.842907	84.2907	0.859386	85.9386	0.851147	85.1147	360	255	441	306	222	173	0.449438	0.454545	0.354296	35.4296	0.379537	37.9537	0.366916	36.6916	551	443	631	488	31	41	0.466159	0.475832	0.0496232	4.96232	0.0807742	8.07742	0.0651987	6.51987	498	484	507	525	4	10	0.495522
MTR2	83	105	121	176	24	32	0.406863	0.373665	0.185272	18.5272	0.176338	17.6338	0.180805	18.0805	168	148	286	180	4	0	0.370044	0.45122	0.0162381	1.62381	0	0	0.00811903	0.811903	191	155	225	190	0	0	0.459135	0.449275	0	0	0	0	0	0	161	144	209	230	0	3	0.435135
MUD1	28	41	59	103	238	314	0.321839	0.284722	0.829202	82.9202	0.786283	78.6283	0.807743	80.7743	444	294	525	344	122	91	0.458204	0.460815	0.200038	20.0038	0.220896	22.0896	0.210467	21.0467	538	527	602	590	18	13	0.47193	0.471799	0.030519	3.0519	0.0226767	2.26767	0.0265978	2.65978	501	534	501	534	0	0	0.5
NBL1	41	73	48	143	381	440	0.460674	0.337963	0.894838	89.4838	0.786638	78.6638	0.840738	84.0738	752	478	1267	811	105	100	0.372462	0.37083	0.0889693	8.89693	0.126982	12.6982	0.107976	10.7976	912	802	1452	1338	6	16	0.385787	0.374766	0.00480125	0.480125	0.0138753	1.38753	0.00933829	0.933829	906	847	1455	1351	7	3	0.383736
NCB2	62	88	154	195	1316	1388	0.287037	0.310954	0.911615	91.1615	0.895641	89.5641	0.903628	90.3628	837	582	1047	692	305	290	0.444268	0.456829	0.242313	24.2313	0.311243	31.1243	0.276778	27.6778	1056	911	1258	1094	39	31	0.456353	0.454364	0.0323701	3.23701	0.0297547	2.97547	0.0310624	3.10624	902	979	1008	1044	9	17	0.472251
NCE101	10	10	159	205	546	639	0.0591716	0.0465116	0.784276	78.4276	0.765333	76.5333	0.774805	77.4805	160	91	565	368	234	200	0.22069	0.198257	0.329754	32.9754	0.389801	38.9801	0.359777	35.9777	225	170	737	567	45	28	0.233888	0.230665	0.0679502	6.79502	0.0556189	5.56189	0.0617846	6.17846	200	236	650	635	11	12	0.235294
NMD2	12	28	47	64	315	389	0.20339	0.304348	0.887621	88.7621	0.880004	88.0004	0.883812	88.3812	223	152	347	225	223	188	0.391228	0.403183	0.427623	42.7623	0.490135	49.0135	0.458879	45.8879	351	343	495	494	26	36	0.414894	0.409797	0.0563679	5.63679	0.0769032	7.69032	0.0666356	6.66356	343	400	456	517	4	14	0.429287
NOG2	148	164	196	218	1621	1574	0.430233	0.429319	0.902386	90.2386	0.88986	88.986	0.896123	89.6123	1508	913	1520	913	1066	831	0.498018	0.5	0.413174	41.3174	0.476491	47.6491	0.444833	44.4833	2237	2091	2283	2305	279	233	0.494912	0.47566	0.109876	10.9876	0.0956404	9.56404	0.102758	10.2758	2241	2324	2399	2387	79	73	0.482974
NYV1	35	57	85	106	1002	1089	0.291667	0.349693	0.934338	93.4338	0.924554	92.4554	0.929446	92.9446	387	275	449	297	255	315	0.462919	0.480769	0.37761	37.761	0.523758	52.3758	0.450684	45.0684	513	474	517	555	32	25	0.498058	0.460641	0.0585001	5.85001	0.046067	4.6067	0.0522835	5.22835	402	492	472	569	9	10	0.459954
OM14	30	67	101	179	972	1106	0.229008	0.272358	0.91981	91.981	0.881629	88.1629	0.900719	90.0719	655	458	877	653	343	306	0.427546	0.412241	0.304866	30.4866	0.348276	34.8276	0.326571	32.6571	779	755	991	957	53	64	0.440113	0.441005	0.0557486	5.57486	0.0686756	6.86756	0.0622121	6.22121	714	839	927	1065	9	22	0.435101
OST5	35	43	302	427	2271	2323	0.103858	0.0914894	0.892243	89.2243	0.855659	85.5659	0.873951	87.3951	483	352	677	535	714	608	0.416379	0.396843	0.544946	54.4946	0.568024	56.8024	0.556485	55.6485	740	593	866	717	109	128	0.460772	0.452672	0.118873	11.8873	0.162258	16.2258	0.140565	14.0565	622	669	689	720	61	101	0.474447
PBA1	32	19	51	45	667	655	0.385542	0.296875	0.938545	93.8545	0.946147	94.6147	0.942346	94.2346	211	144	235	166	187	184	0.473094	0.464516	0.45538	45.538	0.541526	54.1526	0.498453	49.8453	278	270	311	308	20	14	0.471986	0.467128	0.0634066	6.34066	0.0460149	4.60149	0.0547108	5.47108	300	326	321	327	5	10	0.483092
PCC1	44	54	128	122	794	833	0.255814	0.306818	0.881721	88.1721	0.891733	89.1733	0.886727	88.6727	350	237	548	366	152	151	0.389755	0.393035	0.244048	24.4048	0.323827	32.3827	0.283937	28.3937	423	335	637	523	15	11	0.399057	0.390443	0.0264736	2.64736	0.0238821	2.38821	0.0251778	2.51778	382	353	539	550	8	9	0.414767
PFY1	48	89	390	414	3903	4007	0.109589	0.176938	0.917162	91.7162	0.918301	91.8301	0.917731	91.7731	429	297	827	585	1525	1361	0.341561	0.336735	0.688159	68.8159	0.736065	73.6065	0.712112	71.2112	533	518	979	874	288	283	0.352513	0.372126	0.259511	25.9511	0.276226	27.6226	0.267869	26.7869	567	551	870	918	147	198	0.394572
PHO85	6	12	24	49	755	825	0.2	0.196721	0.973691	97.3691	0.951863	95.1863	0.962777	96.2777	103	72	197	141	367	340	0.343333	0.338028	0.690204	69.0204	0.742884	74.2884	0.716544	71.6544	143	131	270	257	30	46	0.346247	0.337629	0.117175	11.7175	0.176611	17.6611	0.146893	14.6893	127	155	250	289	12	8	0.33687
PMI40	22	38	105	169	2660	3044	0.173228	0.183575	0.967054	96.7054	0.954546	95.4546	0.9608	96.08	207	140	360	222	1161	1054	0.365079	0.38674	0.792414	79.2414	0.847071	84.7071	0.819743	81.9743	317	309	499	446	343	328	0.38848	0.409272	0.444706	44.4706	0.456869	45.6869	0.450787	45.0787	297	310	452	451	226	312	0.396529
POP8	12	18	18	32	93	134	0.4	0.36	0.856354	85.6354	0.832505	83.2505	0.844429	84.4429	85	43	157	73	53	42	0.35124	0.37069	0.286935	28.6935	0.404315	40.4315	0.345625	34.5625	120	111	208	111	6	0	0.365854	0.5	0.0330024	3.30024	0	0	0.0165012	1.65012	126	122	126	122	0	0	0.5
PRE3	85	82	128	116	1712	1915	0.399061	0.414141	0.939194	93.9194	0.949468	94.9468	0.944331	94.4331	971	683	985	733	522	502	0.496421	0.482345	0.347988	34.7988	0.414574	41.4574	0.381281	38.1281	1322	1138	1395	1230	55	68	0.486566	0.480574	0.0388835	3.88835	0.0542357	5.42357	0.0465596	4.65596	1261	1250	1317	1359	12	15	0.489139
PRP5	15	31	88	173	17	30	0.145631	0.151961	0.180144	18.0144	0.165361	16.5361	0.172752	17.2752	59	45	301	178	7	10	0.163889	0.201794	0.0260864	2.60864	0.0620496	6.20496	0.044068	4.4068	65	64	65	64	0	0	0.5	0.5	0	0	0	0	0	0	52	67	52	67	0	0	0.5
PSP2	107	139	143	180	886	1070	0.428	0.435737	0.874119	87.4119	0.868411	86.8411	0.871265	87.1265	705	556	775	575	182	216	0.476351	0.4916	0.197043	19.7043	0.276335	27.6335	0.236689	23.6689	757	741	888	850	13	17	0.460182	0.465745	0.015463	1.5463	0.0208274	2.08274	0.0181452	1.81452	710	802	834	877	4	7	0.459845
PTC7	157	136	300	288	707	867	0.343545	0.320755	0.738094	73.8094	0.783732	78.3732	0.760913	76.0913	613	419	831	605	111	73	0.424515	0.40918	0.130672	13.0672	0.121284	12.1284	0.125978	12.5978	585	645	974	900	7	6	0.375241	0.417476	0.00838292	0.838292	0.00750428	0.750428	0.0079436	0.79436	562	620	897	902	3	6	0.385195
PUS2	50	52	81	117	154	190	0.381679	0.307692	0.690063	69.0063	0.662021	66.2021	0.676042	67.6042	193	135	290	202	31	28	0.399586	0.400593	0.109836	10.9836	0.137822	13.7822	0.123829	12.3829	189	196	285	276	3	4	0.398734	0.415254	0.0120134	1.20134	0.0162088	1.62088	0.0141111	1.41111	181	196	272	300	0	0	0.399558
QCR10	26	40	44	58	826	952	0.371429	0.408163	0.956778	95.6778	0.949481	94.9481	0.953129	95.3129	270	175	309	201	319	296	0.466321	0.465426	0.523111	52.3111	0.610436	61.0436	0.566774	56.6774	391	372	440	419	54	42	0.470517	0.470291	0.114663	11.4663	0.0956946	9.56946	0.105179	10.5179	353	438	393	484	7	10	0.47319
QCR9	83	136	128	148	869	1023	0.393365	0.478873	0.88737	88.737	0.877921	87.7921	0.882645	88.2645	675	511	878	628	340	353	0.434643	0.448639	0.300947	30.0947	0.380179	38.0179	0.340563	34.0563	877	779	1124	1021	41	50	0.438281	0.432778	0.0387984	3.87984	0.0517455	5.17455	0.0452719	4.52719	747	862	1040	1108	15	14	0.418019
RAD14	12	20	16	21	126	162	0.428571	0.487805	0.898167	89.8167	0.887612	88.7612	0.892889	89.2889	165	126	176	128	48	56	0.483871	0.496063	0.219501	21.9501	0.305998	30.5998	0.26275	26.275	173	183	182	190	4	7	0.487324	0.490617	0.0220247	2.20247	0.0361634	3.61634	0.0290941	2.90941	185	170	199	177	0	3	0.481771
RBS1	40	58	70	108	556	750	0.363636	0.349398	0.903931	90.3931	0.892294	89.2294	0.898113	89.8113	292	213	302	218	236	202	0.491582	0.4942	0.442707	44.2707	0.483799	48.3799	0.463253	46.3253	422	365	446	417	54	41	0.486175	0.466752	0.110581	11.0581	0.0945291	9.45291	0.102555	10.2555	365	396	398	427	23	28	0.478375
REC107	217	280	316	362	39	29	0.407129	0.436137	0.12393	12.393	0.0816357	8.16357	0.102783	10.2783	378	271	378	271	0	0	0.5	0.5	0	0	0	0	0	0	370	359	370	359	0	0	0.5	0.5	0	0	0	0	0	0	350	385	350	486	0	3	0.5
RFA2	4	11	64	73	773	888	0.0588235	0.130952	0.927447	92.7447	0.931911	93.1911	0.929679	92.9679	239	117	652	386	372	322	0.268238	0.232604	0.407351	40.7351	0.498893	49.8893	0.453122	45.3122	306	299	912	877	51	58	0.251232	0.254252	0.0629044	6.29044	0.0736001	7.36001	0.0682523	6.82523	324	296	899	866	6	10	0.264922
RIM1	53	50	98	86	1623	1534	0.350993	0.367647	0.951792	95.1792	0.954714	95.4714	0.953253	95.3253	853	562	904	580	579	585	0.485487	0.492119	0.397054	39.7054	0.505993	50.5993	0.451524	45.1524	1281	1074	1426	1192	85	94	0.473218	0.473963	0.0589302	5.89302	0.0764183	7.64183	0.0676743	6.76743	1179	1221	1259	1275	18	36	0.483593
RPL13A	166	255	701	742	6428	6347	0.191465	0.255767	0.914814	91.4814	0.911344	91.1344	0.913079	91.3079	861	570	1098	871	3067	2648	0.43951	0.395559	0.755263	75.5263	0.778838	77.8838	0.767051	76.7051	1239	1141	1380	1201	605	551	0.473081	0.48719	0.315384	31.5384	0.319834	31.9834	0.317609	31.7609	1238	1219	1303	1381	218	265	0.48721
RPL13B	43	93	973	1223	3210	3364	0.0423228	0.0706687	0.774681	77.4681	0.746371	74.6371	0.760526	76.0526	468	297	2388	1784	2154	1690	0.163866	0.14272	0.509536	50.9536	0.518123	51.8123	0.513829	51.3829	688	713	3429	3168	874	808	0.167112	0.183716	0.227311	22.7311	0.229221	22.9221	0.228266	22.8266	752	758	3194	3397	465	515	0.190573
RPL14A	311	342	690	867	11656	10947	0.310689	0.282878	0.953203	95.3203	0.938409	93.8409	0.945806	94.5806	2063	1372	2883	2070	6903	5870	0.417105	0.398605	0.730942	73.0942	0.766141	76.6141	0.748542	74.8542	3527	3050	4407	3847	3309	2883	0.444542	0.442221	0.451753	45.1753	0.452054	45.2054	0.451904	45.1904	3535	3789	4293	4353	1638	1771	0.451584
RPL14B	243	271	398	579	6374	6007	0.379095	0.318824	0.949467	94.9467	0.925891	92.5891	0.937679	93.7679	1260	839	1620	1140	3267	2775	0.4375	0.423951	0.690771	69.0771	0.732694	73.2694	0.711733	71.1733	1896	1748	2308	2073	1079	885	0.450999	0.457472	0.337062	33.7062	0.315023	31.5023	0.326042	32.6042	1816	1918	2227	2151	323	357	0.449171
RPL16A	95	169	802	765	7357	6889	0.105909	0.180942	0.910055	91.0055	0.912915	91.2915	0.911485	91.1485	877	594	1499	1115	3039	2687	0.369108	0.347572	0.705364	70.5364	0.742078	74.2078	0.723721	72.3721	1056	1000	1678	1489	708	692	0.386247	0.401768	0.329954	32.9954	0.348696	34.8696	0.339325	33.9325	1047	994	1571	1547	411	500	0.399924
RPL16B	229	278	663	644	6306	6012	0.256726	0.301518	0.919566	91.9566	0.918473	91.8473	0.91902	91.902	801	602	1106	903	4244	3505	0.420031	0.4	0.812732	81.2732	0.817474	81.7474	0.815103	81.5103	1270	1253	1504	1463	2448	2146	0.457823	0.46134	0.636693	63.6693	0.611027	61.1027	0.62386	62.386	1241	1323	1441	1580	1711	1828	0.462714
RPL17A	418	434	526	648	13020	12714	0.442797	0.401109	0.964575	96.4575	0.957656	95.7656	0.961115	96.1115	3087	2068	3642	2801	8597	7517	0.458761	0.424728	0.71735	71.735	0.751199	75.1199	0.734274	73.4274	5441	4963	6530	5822	4190	3739	0.454515	0.460176	0.409779	40.9779	0.407934	40.7934	0.408856	40.8856	5551	5864	6529	7119	1900	2247	0.45952
RPL17B	311	387	359	450	11777	11551	0.464179	0.462366	0.972203	97.2203	0.964845	96.4845	0.968524	96.8524	1746	1237	1784	1330	6065	5509	0.494618	0.481885	0.774565	77.4565	0.81084	81.084	0.792703	79.2703	2669	2377	2783	2478	2009	1764	0.489545	0.489598	0.42418	42.418	0.420746	42.0746	0.422463	42.2463	2576	2749	2730	2808	505	688	0.485488
RPL18A	469	469	808	1073	14244	13129	0.367267	0.30415	0.954212	95.4212	0.936562	93.6562	0.945387	94.5387	1641	1246	2521	1908	8470	7944	0.394282	0.395054	0.795751	79.5751	0.828322	82.8322	0.812036	81.2036	2832	2633	3713	3389	3705	3459	0.432697	0.43723	0.526518	52.6518	0.530729	53.0729	0.528623	52.8623	2607	2901	3419	3631	2478	3029	0.432625
RPL18B	494	573	604	823	4251	3838	0.449909	0.410458	0.88461	88.461	0.841965	84.1965	0.863287	86.3287	753	578	1048	788	1889	1725	0.418101	0.423133	0.671367	67.1367	0.711592	71.1592	0.69148	69.148	823	729	1252	1186	289	315	0.396627	0.380679	0.210819	21.0819	0.237372	23.7372	0.224095	22.4095	788	913	1196	1218	62	94	0.397177
RPL21A	120	224	736	763	5437	5189	0.140187	0.22695	0.893267	89.3267	0.890101	89.0101	0.891684	89.1684	1210	836	2127	1457	3205	2708	0.362601	0.364588	0.641065	64.1065	0.687556	68.7556	0.66431	66.431	1833	1639	3221	2802	1435	1287	0.362683	0.369061	0.345567	34.5567	0.35166	35.166	0.348614	34.8614	1877	1809	2956	3234	940	1009	0.388372
RPL21B	137	162	428	439	6092	5488	0.242478	0.269551	0.944578	94.4578	0.937745	93.7745	0.941162	94.1162	1012	675	1198	801	3357	2924	0.457919	0.457317	0.751036	75.1036	0.7973	79.73	0.774168	77.4168	1559	1433	1844	1665	1052	1018	0.458125	0.462556	0.38041	38.041	0.395234	39.5234	0.387822	38.7822	1659	1642	1751	1872	336	382	0.48651
RPL22A	414	471	856	888	4454	4624	0.325984	0.346578	0.86219	86.219	0.861485	86.1485	0.861837	86.1837	1263	928	2093	1551	3007	2641	0.376341	0.374344	0.628076	62.8076	0.667124	66.7124	0.6476	64.76	1668	1519	2801	2555	1378	1345	0.373238	0.372852	0.366868	36.6868	0.382785	38.2785	0.374826	37.4826	1719	1636	2657	2789	1111	1151	0.392824
RPL22B	960	828	1096	1205	1212	1045	0.466926	0.40728	0.539987	53.9987	0.49846	49.846	0.519224	51.9224	902	731	1300	915	558	485	0.409628	0.444107	0.32921	32.921	0.367902	36.7902	0.348556	34.8556	1173	990	1572	1347	29	35	0.427322	0.42362	0.0202727	2.02727	0.0284375	2.84375	0.0243551	2.43551	1086	1102	1527	1451	6	8	0.415614
RPL23A	299	363	420	519	7605	7737	0.415855	0.411565	0.953643	95.3643	0.944482	94.4482	0.949062	94.9062	1009	718	1024	757	4706	3645	0.496311	0.48678	0.82236	82.236	0.831619	83.1619	0.82699	82.699	1712	1591	1738	1619	1749	1558	0.496232	0.495639	0.50344	50.344	0.492551	49.2551	0.497996	49.7996	1737	1783	1748	1998	881	953	0.498422
RPL23B	255	389	471	522	5454	5607	0.35124	0.427003	0.932446	93.2446	0.923387	92.3387	0.927917	92.7917	1781	1264	2066	1353	3687	2916	0.462958	0.482996	0.655926	65.5926	0.690012	69.0012	0.672969	67.2969	2803	2335	3005	2706	1313	1204	0.48261	0.463202	0.3111	31.11	0.322084	32.2084	0.316592	31.6592	2507	2741	2968	3021	679	718	0.4579
RPL24A	90	160	711	800	3846	3992	0.11236	0.166667	0.8571	85.71	0.85202	85.202	0.85456	85.456	609	393	1635	1170	2807	2337	0.27139	0.25144	0.674184	67.4184	0.705694	70.5694	0.689939	68.9939	973	884	2599	2227	1188	1153	0.272396	0.284153	0.355254	35.5254	0.384541	38.4541	0.369897	36.9897	1012	1018	2413	2560	751	789	0.295474
RPL24B	119	137	968	1026	2457	2566	0.109476	0.117799	0.737383	73.7383	0.735818	73.5818	0.7366	73.66	899	678	3156	2393	1265	1053	0.221702	0.220775	0.322653	32.2653	0.343291	34.3291	0.332972	33.2972	1178	1051	4335	3607	326	332	0.213677	0.225633	0.0817776	8.17776	0.0987425	9.87425	0.09026	9.026	1215	1251	3831	4273	200	258	0.240785
RPL25	107	169	585	632	5559	5317	0.154624	0.210986	0.915802	91.5802	0.908685	90.8685	0.912243	91.2243	1543	1191	3525	2681	3956	3414	0.304459	0.307593	0.575204	57.5204	0.605675	60.5675	0.590439	59.0439	2094	1939	4809	4266	2633	2410	0.303346	0.31249	0.397829	39.7829	0.405121	40.5121	0.401475	40.1475	2236	2196	4724	5058	1669	1794	0.321264
RPL26A	60	95	636	735	4731	4741	0.0862069	0.114458	0.88973	88.973	0.877517	87.7517	0.883623	88.3623	530	374	1871	1440	3318	2606	0.220741	0.206174	0.678114	67.8114	0.68109	68.109	0.679602	67.9602	851	828	3006	2629	1104	1038	0.220638	0.239514	0.303754	30.3754	0.320803	32.0803	0.312278	31.2278	896	1001	2663	3095	339	387	0.251756
RPL26B	110	217	521	520	5174	5318	0.174326	0.294437	0.920092	92.0092	0.925065	92.5065	0.922578	92.2578	849	578	1549	1015	3048	2454	0.354045	0.362837	0.700824	70.0824	0.741291	74.1291	0.721057	72.1057	1269	1141	2507	2091	890	789	0.33607	0.353032	0.298563	29.8563	0.310066	31.0066	0.304315	30.4315	1243	1163	2340	2158	492	550	0.346916
RPL27A	275	423	472	529	10514	9446	0.368139	0.444328	0.963396	96.3396	0.95146	95.146	0.957428	95.7428	1907	1388	2156	1617	6630	5490	0.469358	0.461897	0.764783	76.4783	0.784148	78.4148	0.774466	77.4466	2591	2381	3098	2806	4298	3838	0.45544	0.459032	0.599853	59.9853	0.595139	59.5139	0.597496	59.7496	2628	2676	2972	3293	3059	3123	0.469286
RPL27B	77	128	439	437	7527	7060	0.149225	0.226549	0.951342	95.1342	0.950586	95.0586	0.950964	95.0964	475	311	1098	829	3591	3293	0.301971	0.272807	0.797845	79.7845	0.827244	82.7244	0.812545	81.2545	638	568	1551	1414	634	644	0.291457	0.286579	0.330398	33.0398	0.354713	35.4713	0.342555	34.2555	637	663	1474	1496	224	269	0.301753
RPL28	1282	1435	1888	1868	7510	7381	0.404416	0.434454	0.820503	82.0503	0.814601	81.4601	0.817552	81.7552	2588	1888	3356	2442	4826	3866	0.435397	0.436028	0.614964	61.4964	0.637276	63.7276	0.62612	62.612	3533	3182	4675	4032	2857	2755	0.430434	0.441087	0.405798	40.5798	0.429658	42.9658	0.417728	41.7728	3641	3566	4590	4862	2357	2456	0.442352
RPL29	15	21	816	997	1290	1488	0.0180505	0.0206287	0.61677	61.677	0.603684	60.3684	0.610227	61.0227	192	108	3136	2333	863	679	0.0576923	0.0442442	0.225376	22.5376	0.233048	23.3048	0.229212	22.9212	187	173	3749	3315	342	350	0.0475102	0.0495986	0.0872055	8.72055	0.0997389	9.97389	0.0934722	9.34722	240	225	3616	3632	242	240	0.0622407
RPL2A	198	236	917	972	5582	5697	0.177578	0.195364	0.876113	87.6113	0.873075	87.3075	0.874594	87.4594	1337	894	2174	1606	2163	1929	0.380803	0.3576	0.538292	53.8292	0.58804	58.804	0.563166	56.3166	1999	1737	3028	2439	626	555	0.397653	0.415948	0.192923	19.2923	0.205403	20.5403	0.199163	19.9163	1861	1865	2622	2505	406	520	0.415124
RPL2B	168	241	981	995	6019	5741	0.146214	0.194984	0.874711	87.4711	0.871303	87.1303	0.873007	87.3007	865	639	2018	1499	3860	3104	0.300035	0.298877	0.697751	69.7751	0.714226	71.4226	0.705988	70.5988	1225	1169	2820	2649	1863	1727	0.302843	0.306181	0.443575	44.3575	0.440241	44.0241	0.441908	44.1908	1231	1339	2834	3049	1228	1394	0.302829
RPL30	448	445	906	977	6659	6424	0.330871	0.31294	0.898231	89.8231	0.887965	88.7965	0.893098	89.3098	1283	835	2389	1665	4148	3295	0.349401	0.334	0.67441	67.441	0.703642	70.3642	0.689026	68.9026	2130	1790	3403	2956	1446	1406	0.384963	0.37716	0.331732	33.1732	0.358469	35.8469	0.345101	34.5101	2236	2275	3402	3205	903	954	0.396595
RPL31A	37	100	325	424	6910	7181	0.10221	0.19084	0.958981	95.8981	0.951987	95.1987	0.955484	95.5484	610	405	2769	2024	4804	3807	0.180527	0.166735	0.668779	66.8779	0.684582	68.4582	0.676681	67.6681	665	606	3304	3066	2627	2349	0.167549	0.165033	0.478608	47.8608	0.468954	46.8954	0.473781	47.3781	699	633	3191	3179	1838	1764	0.179692
RPL31B	196	267	214	288	3060	3713	0.478049	0.481081	0.937099	93.7099	0.930367	93.0367	0.933733	93.3733	1004	657	1347	929	2004	1655	0.427052	0.41425	0.625366	62.5366	0.669681	66.9681	0.647524	64.7524	1484	1320	2077	1733	530	550	0.416737	0.432362	0.224588	22.4588	0.261353	26.1353	0.242971	24.2971	1404	1511	2000	2006	219	247	0.412456
RPL32	191	267	560	671	4405	4575	0.254328	0.284648	0.904303	90.4303	0.891639	89.1639	0.897971	89.7971	1556	1125	4128	3055	3443	2729	0.273751	0.269139	0.50139	50.139	0.518372	51.8372	0.509881	50.9881	2027	1890	5545	4992	1883	1781	0.267697	0.274629	0.290307	29.0307	0.300789	30.0789	0.295548	29.5548	2095	1945	5308	5357	1500	1505	0.282993
RPL33A	152	188	323	454	4489	4417	0.32	0.292835	0.943606	94.3606	0.921532	92.1532	0.932569	93.2569	1021	733	2060	1247	3079	2589	0.331386	0.370202	0.642169	64.2169	0.710149	71.0149	0.676159	67.6159	1514	1483	3467	3067	1581	1472	0.303955	0.325934	0.354932	35.4932	0.365922	36.5922	0.360427	36.0427	1611	1661	3299	3383	1026	1047	0.328106
RPL33B	9	33	483	530	3824	3749	0.0182927	0.0586146	0.889648	88.9648	0.882145	88.2145	0.885896	88.5896	229	162	1674	1237	2241	1855	0.120336	0.115797	0.599019	59.9019	0.625101	62.5101	0.61206	61.206	337	358	2608	2307	910	835	0.114431	0.134334	0.279302	27.9302	0.289912	28.9912	0.284607	28.4607	399	352	2609	2621	400	430	0.132646
RPL34A	56	89	957	1141	6559	6392	0.0552813	0.0723577	0.878493	87.8493	0.857195	85.7195	0.867844	86.7844	489	336	2203	1655	4083	3308	0.181649	0.168759	0.683387	68.3387	0.69783	69.783	0.690609	69.0609	884	744	3248	3017	1553	1432	0.21394	0.19782	0.361563	36.1563	0.358058	35.8058	0.35981	35.981	903	854	3010	3385	770	864	0.230769
RPL34B	280	447	466	515	7402	7249	0.375335	0.464657	0.949195	94.9195	0.937483	93.7483	0.943339	94.3339	1487	1081	1554	1118	4814	3831	0.488984	0.491587	0.759877	75.9877	0.776951	77.6951	0.768414	76.8414	2096	1994	2154	2092	1999	1923	0.493176	0.488008	0.484677	48.4677	0.484728	48.4728	0.484702	48.4702	2075	2216	2176	2240	1211	1241	0.48812
RPL35A	35	50	394	450	1812	1929	0.0815851	0.1	0.832449	83.2449	0.824711	82.4711	0.82858	82.858	251	151	1126	801	1113	949	0.18228	0.158613	0.535224	53.5224	0.576234	57.6234	0.555729	55.5729	381	354	1675	1542	333	326	0.185311	0.186709	0.188326	18.8326	0.198033	19.8033	0.19318	19.318	433	382	1676	1739	152	164	0.205311
RPL35B	15	24	363	485	2233	2491	0.0396825	0.0471513	0.86477	86.477	0.843188	84.3188	0.853979	85.3979	87	59	1037	774	1412	1141	0.0774021	0.0708283	0.594409	59.4409	0.612007	61.2007	0.603208	60.3208	116	115	1406	1254	527	512	0.0762155	0.0840029	0.287243	28.7243	0.306528	30.6528	0.296886	29.6886	122	144	1268	1372	315	285	0.0877698
RPL36A	44	99	609	678	3107	3117	0.0673813	0.127413	0.844769	84.4769	0.837627	83.7627	0.841198	84.1198	452	261	2018	1339	1793	1531	0.182996	0.163125	0.508735	50.8735	0.568268	56.8268	0.538502	53.8502	594	566	2652	2305	748	706	0.182994	0.197144	0.247404	24.7404	0.264601	26.4601	0.256002	25.6002	674	577	2544	2315	590	550	0.209447
RPL36B	74	112	407	504	3328	3538	0.153846	0.181818	0.903422	90.3422	0.891021	89.1021	0.897222	89.7222	658	425	1318	932	2312	1875	0.332996	0.313191	0.677962	67.7962	0.708025	70.8025	0.692993	69.2993	1037	860	2011	1732	942	951	0.340223	0.33179	0.359319	35.9319	0.397296	39.7296	0.378308	37.8308	1032	968	1830	1756	603	649	0.360587
RPL37A	44	92	386	488	1586	1685	0.102326	0.158621	0.81879	81.879	0.798508	79.8508	0.808649	80.8649	548	360	2222	1366	1155	901	0.197834	0.208575	0.379207	37.9207	0.43798	43.798	0.408594	40.8594	791	771	3487	3375	382	361	0.184899	0.185962	0.113336	11.3336	0.111017	11.1017	0.112176	11.2176	882	799	3640	3754	208	252	0.195046
RPL37B	34	92	489	629	1216	1447	0.0650096	0.127601	0.725788	72.5788	0.720805	72.0805	0.723296	72.3296	547	333	2411	1643	884	744	0.184922	0.168522	0.29963	29.963	0.343453	34.3453	0.321541	32.1541	648	583	3266	2921	314	272	0.16556	0.166381	0.0997914	9.97914	0.0970043	9.70043	0.0983978	9.83978	656	597	3037	2968	140	147	0.177633
RPL39	181	262	560	626	2799	2806	0.244265	0.295045	0.8569	85.69	0.84401	84.401	0.850455	85.0455	1910	1451	4583	3239	2003	1628	0.294163	0.309382	0.345363	34.5363	0.377391	37.7391	0.361377	36.1377	2179	1977	5472	4819	1194	1176	0.284799	0.290906	0.208444	20.8444	0.227543	22.7543	0.217994	21.7994	2242	2249	5405	5645	826	790	0.293187
RPL40A	126	192	629	650	3709	3548	0.166887	0.228029	0.871874	87.1874	0.866727	86.6727	0.8693	86.93	895	619	1733	1277	2435	2120	0.340563	0.326477	0.627156	62.7156	0.66621	66.621	0.646683	64.6683	1379	1272	2930	2564	1033	969	0.320028	0.331595	0.297983	29.7983	0.31212	31.212	0.305051	30.5051	1403	1354	2797	2989	646	793	0.334048
RPL40B	47	81	903	957	4365	3950	0.0494737	0.0780347	0.835303	83.5303	0.816345	81.6345	0.825824	82.5824	438	272	1831	1380	2794	2295	0.193037	0.164649	0.641399	64.1399	0.657109	65.7109	0.649254	64.9254	540	517	2746	2471	1257	1233	0.164334	0.173025	0.345284	34.5284	0.36632	36.632	0.355802	35.5802	550	642	2690	2814	787	823	0.169753
RPL42A	129	184	1011	994	2467	2585	0.113158	0.156197	0.730272	73.0272	0.748737	74.8737	0.739504	73.9504	1122	709	3285	2382	1686	1352	0.254595	0.229376	0.381421	38.1421	0.403551	40.3551	0.392486	39.2486	1584	1398	4869	4158	848	769	0.245467	0.25162	0.172686	17.2686	0.181688	18.1688	0.177187	17.7187	1626	1631	4497	4830	461	417	0.265556
RPL42B	82	141	1017	1151	2999	3086	0.0746133	0.109133	0.759965	75.9965	0.747799	74.7799	0.753882	75.3882	1132	746	3807	2714	2161	1787	0.229196	0.215607	0.403556	40.3556	0.438346	43.8346	0.420951	42.0951	1402	1366	5046	4720	1077	1005	0.217432	0.22445	0.202038	20.2038	0.202124	20.2124	0.202081	20.2081	1518	1473	5009	5005	669	590	0.232572
RPL6A	108	186	290	304	4883	4730	0.271357	0.379592	0.953038	95.3038	0.948046	94.8046	0.950542	95.0542	1029	602	1569	1105	2938	2550	0.396074	0.352665	0.684351	68.4351	0.733262	73.3262	0.708807	70.8807	1494	1463	2395	2339	1368	1345	0.38416	0.384797	0.400366	40.0366	0.401862	40.1862	0.401114	40.1114	1660	1691	2550	2849	844	925	0.394299
RPL6B	17	81	370	485	5427	5626	0.0439276	0.14311	0.938685	93.8685	0.929428	92.9428	0.934057	93.4057	524	298	1614	1168	3652	2919	0.245089	0.203274	0.730568	73.0568	0.746518	74.6518	0.738543	73.8543	747	691	2495	2378	1413	1368	0.230413	0.225155	0.403111	40.3111	0.406397	40.6397	0.404754	40.4754	803	764	2466	2638	1036	1043	0.245641
RPO26	6	11	21	38	335	435	0.222222	0.22449	0.949905	94.9905	0.9316	93.16	0.940753	94.0753	147	111	268	203	157	152	0.354217	0.353503	0.410844	41.0844	0.47135	47.135	0.441097	44.1097	188	164	348	289	11	24	0.350746	0.362031	0.0363179	3.63179	0.0896371	8.96371	0.0629775	6.29775	202	207	382	353	6	8	0.34589
RPP1B	209	267	783	899	8732	9132	0.210685	0.228988	0.929523	92.9523	0.923704	92.3704	0.926614	92.6614	1457	1094	2173	1627	4522	4200	0.401377	0.402058	0.705723	70.5723	0.748303	74.8303	0.727013	72.7013	2142	2025	2607	2560	1411	1388	0.451042	0.441658	0.37051	37.051	0.373951	37.3951	0.372231	37.2231	2059	2210	2501	2625	600	676	0.451535
RPS0A	250	246	291	376	11354	10868	0.462107	0.395498	0.9766	97.66	0.971	97.1	0.9738	97.38	1123	869	1520	1006	6388	5263	0.424896	0.463467	0.825396	82.5396	0.848118	84.8118	0.836757	83.6757	1982	1845	2321	2131	2781	2428	0.460609	0.464034	0.562289	56.2289	0.548541	54.8541	0.555415	55.5415	1838	2159	2322	2487	1409	1792	0.441827
RPS0B	304	395	510	702	14664	13707	0.373464	0.360073	0.971315	97.1315	0.958635	95.8635	0.964975	96.4975	1805	1377	2075	1488	8002	7072	0.465206	0.480628	0.804108	80.4108	0.83135	83.135	0.817729	81.7729	2880	2634	2990	2820	3364	2989	0.49063	0.482948	0.533966	53.3966	0.522628	52.2628	0.528297	52.8297	2763	2953	3043	3007	1784	2119	0.475887
RPS10A	251	466	693	736	9611	9434	0.26589	0.387687	0.943506	94.3506	0.937277	93.7277	0.940392	94.0392	1739	1178	2025	1611	6409	5173	0.462009	0.422374	0.771995	77.1995	0.783656	78.3656	0.777825	77.7825	2618	2489	3414	2954	3212	2762	0.434019	0.457285	0.511423	51.1423	0.501875	50.1875	0.506649	50.6649	2719	2859	3214	3633	1720	1837	0.458284
RPS10B	276	307	301	346	8350	7523	0.478336	0.470138	0.966542	96.6542	0.958263	95.8263	0.962403	96.2403	1070	805	1235	869	4478	3876	0.464208	0.480884	0.794478	79.4478	0.822193	82.2193	0.808335	80.8335	1587	1416	1832	1723	1861	1639	0.464171	0.451099	0.519937	51.9937	0.508452	50.8452	0.514194	51.4194	1519	1605	1931	1989	937	1087	0.44029
RPS11A	182	270	555	683	9374	8982	0.246947	0.283316	0.952944	95.2944	0.940722	94.0722	0.946833	94.6833	1810	1433	3247	2502	6322	5165	0.35792	0.364168	0.698203	69.8203	0.709702	70.9702	0.703953	70.3953	2369	2311	4412	4109	3642	3396	0.349359	0.359969	0.496168	49.6168	0.495204	49.5204	0.495686	49.5686	2515	2907	4365	4922	2378	2515	0.365552
RPS11B	272	355	503	564	10733	10125	0.350968	0.386289	0.962176	96.2176	0.954444	95.4444	0.95831	95.831	1171	857	1327	899	5116	4451	0.468775	0.488041	0.803156	80.3156	0.835162	83.5162	0.819159	81.9159	1682	1558	1950	1810	1919	1864	0.463106	0.462589	0.512432	51.2432	0.523974	52.3974	0.518203	51.8203	1689	1680	1913	1840	1585	1773	0.468906
RPS13	1196	1120	1228	1192	6820	6383	0.493399	0.484429	0.849081	84.9081	0.846538	84.6538	0.84781	84.781	2068	1530	2363	1647	3687	3237	0.466712	0.481586	0.623613	62.3613	0.670512	67.0512	0.647063	64.7063	2617	2392	3094	2673	2696	2443	0.458238	0.472261	0.483898	48.3898	0.490238	49.0238	0.487068	48.7068	2458	2537	2962	2904	2386	2472	0.453506
RPS14A	68	93	479	473	2889	2999	0.124314	0.164311	0.870992	87.0992	0.879585	87.9585	0.875289	87.5289	533	382	1008	761	1867	1608	0.345879	0.334208	0.68875	68.875	0.71711	71.711	0.70293	70.293	817	783	1548	1350	897	802	0.345455	0.367089	0.409127	40.9127	0.412581	41.2581	0.410854	41.0854	858	842	1302	1370	678	767	0.397222
RPS14B	267	324	1444	1334	5770	5750	0.156049	0.195416	0.82073	82.073	0.834951	83.4951	0.82784	82.784	1318	993	4414	3382	2534	2308	0.229937	0.226971	0.406343	40.6343	0.44835	44.835	0.427346	42.7346	1591	1527	5428	4769	544	530	0.22667	0.242535	0.106619	10.6619	0.117446	11.7446	0.112033	11.2033	1741	1713	4859	5261	317	345	0.263788
RPS16A	219	305	503	574	7423	6866	0.303324	0.346985	0.946829	94.6829	0.934574	93.4574	0.940701	94.0701	1035	732	1067	777	4448	3730	0.492388	0.485089	0.808839	80.8839	0.831629	83.1629	0.820234	82.0234	1578	1476	1762	1593	1837	1695	0.472455	0.480938	0.523054	52.3054	0.524487	52.4487	0.52377	52.377	1574	1727	1778	1730	948	1106	0.46957
RPS16B	104	204	686	682	8495	8110	0.131646	0.230248	0.933067	93.3067	0.934123	93.4123	0.933595	93.3595	1059	702	1874	1310	4778	4163	0.361064	0.348907	0.751526	75.1526	0.791315	79.1315	0.77142	77.142	1435	1364	2831	2572	1686	1584	0.336381	0.346545	0.416562	41.6562	0.423827	42.3827	0.420195	42.0195	1489	1541	2633	3044	802	1009	0.361232
RPS17A	69	128	547	636	2711	2731	0.112013	0.167539	0.846009	84.6009	0.832142	83.2142	0.839076	83.9076	599	393	1702	1124	2015	1643	0.260322	0.259064	0.587487	58.7487	0.637409	63.7409	0.612448	61.2448	974	868	2705	2361	1190	1115	0.264746	0.268814	0.34626	34.626	0.362642	36.2642	0.354451	35.4451	981	1034	2491	2764	922	890	0.282546
RPS17B	29	32	859	881	3164	2910	0.0326577	0.0350493	0.791813	79.1813	0.77368	77.368	0.782747	78.2747	254	182	1906	1278	1497	1269	0.117593	0.124658	0.466539	46.6539	0.526474	52.6474	0.496506	49.6506	328	319	2388	2098	359	335	0.120766	0.131982	0.143702	14.3702	0.152397	15.2397	0.14805	14.805	366	356	2245	2267	212	237	0.140176
RPS18A	220	281	544	663	9288	8962	0.287958	0.297669	0.953721	95.3721	0.942249	94.2249	0.947985	94.7985	1205	846	1482	1108	5821	4990	0.448456	0.432958	0.810862	81.0862	0.833812	83.3812	0.822337	82.2337	1912	1696	2175	2017	3257	3018	0.467825	0.456773	0.613491	61.3491	0.617383	61.7383	0.615437	61.5437	1893	2014	2118	2406	2190	2538	0.471952
RPS18B	238	362	598	608	10300	9566	0.284689	0.373196	0.9541	95.41	0.948801	94.8801	0.951451	95.1451	2271	1556	2354	1735	6046	5222	0.491027	0.472805	0.723271	72.3271	0.759855	75.9855	0.741563	74.1563	3747	3451	3988	3494	1696	1586	0.484421	0.496904	0.304638	30.4638	0.313523	31.3523	0.309081	30.9081	3729	3835	3807	4129	467	605	0.494825
RPS19A	128	188	1032	1013	6417	6390	0.110345	0.156536	0.873151	87.3151	0.878488	87.8488	0.875819	87.5819	763	463	1913	1410	3834	3220	0.285127	0.247197	0.707497	70.7497	0.7325	73.25	0.719999	71.9999	982	916	2581	2246	1740	1542	0.27561	0.28969	0.448419	44.8419	0.453168	45.3168	0.450793	45.0793	1052	967	2327	2428	837	902	0.311335
RPS19B	28	52	933	996	7122	7053	0.0291363	0.0496183	0.887075	88.7075	0.881387	88.1387	0.884231	88.4231	421	261	2300	1682	4876	4112	0.154723	0.134328	0.708178	70.8178	0.733877	73.3877	0.721027	72.1027	584	560	3449	3176	2549	2304	0.144805	0.149893	0.456554	45.6554	0.452841	45.2841	0.454697	45.4697	595	657	3322	3504	1545	1598	0.151902
RPS21A	68	107	315	356	6109	5605	0.177546	0.231102	0.957502	95.7502	0.949444	94.9444	0.953473	95.3473	1135	711	2172	1481	2518	2067	0.343211	0.324361	0.580976	58.0976	0.626698	62.6698	0.603837	60.3837	1537	1398	3025	2542	600	631	0.336914	0.354822	0.192082	19.2082	0.228038	22.8038	0.21006	21.006	1608	1545	2827	2947	304	424	0.36257
RPS21B	19	51	567	633	3631	3551	0.0324232	0.0745614	0.868612	86.8612	0.857604	85.7604	0.863108	86.3108	401	292	2654	1899	2361	1912	0.13126	0.133272	0.500289	50.0289	0.531579	53.1579	0.515934	51.5934	505	557	4163	3633	1063	912	0.108183	0.132936	0.220071	22.0071	0.220498	22.0498	0.220284	22.0284	642	689	3814	4247	663	710	0.144075
RPS23A	252	321	280	392	4501	4308	0.473684	0.45021	0.944054	94.4054	0.922872	92.2872	0.933463	93.3463	2710	1661	2721	1804	3001	2209	0.498987	0.479365	0.524971	52.4971	0.560027	56.0027	0.542499	54.2499	4419	4041	4963	4186	1026	847	0.471008	0.491188	0.178971	17.8971	0.170705	17.0705	0.174838	17.4838	4619	4494	4964	4898	484	436	0.481999
RPS23B	131	234	229	297	9176	8809	0.363889	0.440678	0.979365	97.9365	0.970343	97.0343	0.974854	97.4854	1648	1025	2209	1318	6096	5026	0.427275	0.437473	0.755831	75.5831	0.808582	80.8582	0.782206	78.2206	2275	2188	3019	2959	2848	2613	0.429732	0.425102	0.513405	51.3405	0.49826	49.826	0.505833	50.5833	2335	2362	3212	3313	1679	1791	0.420948
RPS24A	28	52	607	695	2593	2698	0.0440945	0.0696118	0.816829	81.6829	0.805797	80.5797	0.811313	81.1313	568	356	2382	1827	1838	1492	0.192542	0.163078	0.474846	47.4846	0.484555	48.4555	0.479701	47.9701	909	757	3794	3240	864	796	0.193281	0.189392	0.210712	21.0712	0.223236	22.3236	0.216974	21.6974	884	931	3687	3830	577	576	0.193393
RPS24B	229	313	493	522	3115	3598	0.317175	0.37485	0.883872	88.3872	0.890229	89.0229	0.887051	88.7051	1256	771	1356	1039	1758	1484	0.480858	0.425967	0.573402	57.3402	0.616064	61.6064	0.594733	59.4733	1763	1572	1969	1641	351	323	0.472401	0.489262	0.157917	15.7917	0.167337	16.7337	0.162627	16.2627	1682	1708	1723	1917	176	193	0.493979
RPS25A	177	203	797	819	2666	2782	0.181725	0.19863	0.795742	79.5742	0.799737	79.9737	0.79774	79.774	773	529	2101	1650	1889	1519	0.268963	0.242772	0.519982	51.9982	0.524362	52.4362	0.522172	52.2172	1131	1043	3093	2823	917	840	0.267756	0.269788	0.263153	26.3153	0.26392	26.392	0.263537	26.3537	1154	1123	2964	3173	627	648	0.280233
RPS25B	28	33	726	810	3015	3104	0.0371353	0.0391459	0.811557	81.1557	0.799262	79.9262	0.80541	80.541	171	103	1565	1122	1462	1188	0.0985023	0.0840816	0.505937	50.5937	0.534096	53.4096	0.520016	52.0016	237	192	1984	1673	451	416	0.106709	0.102949	0.200571	20.0571	0.214817	21.4817	0.207694	20.7694	254	187	1725	1936	201	260	0.128348
RPS26A	1	4	846	981	742	752	0.00118064	0.00406091	0.467548	46.7548	0.434925	43.4925	0.451237	45.1237	36	22	2615	1961	531	389	0.0135798	0.0110943	0.170686	17.0686	0.167061	16.7061	0.168874	16.8874	77	71	4127	3660	149	146	0.0183159	0.0190298	0.0354608	3.54608	0.0390614	3.90614	0.0372611	3.72611	74	74	3812	4183	55	42	0.0190427
RPS26B	49	57	699	723	3681	3753	0.065508	0.0730769	0.848661	84.8661	0.847689	84.7689	0.848175	84.8175	285	191	2139	1609	1589	1403	0.117574	0.106111	0.452704	45.2704	0.490296	49.0296	0.4715	47.15	302	293	2772	2389	331	320	0.0982433	0.109247	0.115721	11.5721	0.129031	12.9031	0.122376	12.2376	294	320	2477	2584	121	175	0.106099
RPS27A	40	69	754	821	2276	2335	0.0503778	0.0775281	0.760179	76.0179	0.753785	75.3785	0.756982	75.6982	789	575	3646	2565	1530	1159	0.177903	0.183121	0.327782	32.7782	0.344983	34.4983	0.336383	33.6383	1349	1201	5603	4766	448	437	0.194045	0.201274	0.0857329	8.57329	0.0974259	9.74259	0.0915794	9.15794	1314	1407	5146	5481	103	103	0.203406
RPS27B	153	210	506	551	4523	4492	0.23217	0.275953	0.914283	91.4283	0.907676	90.7676	0.91098	91.098	1728	1188	2398	1598	3245	2733	0.418808	0.426418	0.60514	60.514	0.657577	65.7577	0.631358	63.1358	2671	2509	3961	3439	1533	1473	0.402744	0.421822	0.308174	30.8174	0.325906	32.5906	0.31704	31.704	2787	2818	3645	3734	771	754	0.433302
RPS29A	328	505	326	390	2335	2377	0.501529	0.564246	0.877159	87.7159	0.839369	83.9369	0.858264	85.8264	1997	1366	1197	817	1473	1181	0.625235	0.625744	0.464641	46.4641	0.50437	50.437	0.484506	48.4506	3084	2705	1746	1578	574	536	0.638509	0.631567	0.180826	18.0826	0.189682	18.9682	0.185254	18.5254	3107	3219	1814	1879	162	157	0.631376
RPS29B	18	29	837	871	1054	1083	0.0210526	0.0322222	0.562506	56.2506	0.562052	56.2052	0.562279	56.2279	234	164	2068	1524	655	562	0.101651	0.0971564	0.258222	25.8222	0.287635	28.7635	0.272929	27.2929	373	412	3184	2820	202	203	0.104864	0.127475	0.0653462	6.53462	0.0747412	7.47412	0.0700437	7.00437	452	436	3074	3099	77	60	0.128191
RPS30A	107	183	727	829	2581	2748	0.128297	0.18083	0.799453	79.9453	0.794177	79.4177	0.796815	79.6815	1131	773	2616	1836	1513	1272	0.301841	0.296282	0.411056	41.1056	0.455416	45.5416	0.433236	43.3236	1550	1418	3578	3134	657	571	0.302262	0.311511	0.181391	18.1391	0.180101	18.0101	0.180746	18.0746	1608	1556	3393	3413	490	516	0.321536
RPS30B	36	53	574	678	1256	1375	0.0590164	0.0725034	0.698457	69.8457	0.684868	68.4868	0.691663	69.1663	323	187	2514	1664	812	663	0.113853	0.101026	0.263932	26.3932	0.304438	30.4438	0.284185	28.4185	423	415	3566	3035	355	326	0.106042	0.12029	0.0989489	9.89489	0.107031	10.7031	0.10299	10.299	470	414	3401	3311	193	157	0.121416
RPS4A	89	107	1118	1211	7571	7559	0.0737365	0.0811836	0.879007	87.9007	0.870815	87.0815	0.874911	87.4911	680	494	2191	1627	4405	3542	0.236851	0.232909	0.706142	70.6142	0.722103	72.2103	0.714123	71.4123	1073	1034	2836	2629	1902	1759	0.274495	0.282282	0.447102	44.7102	0.446701	44.6701	0.446901	44.6901	1051	1117	2618	2837	1361	1645	0.286454
RPS4B	121	166	731	720	8098	8015	0.142019	0.187359	0.926294	92.6294	0.928608	92.8608	0.927451	92.7451	586	505	1992	1560	4390	3775	0.227308	0.244552	0.724135	72.4135	0.74355	74.355	0.733842	73.3842	673	712	2317	2195	2039	1988	0.225084	0.244926	0.511545	51.1545	0.52045	52.045	0.515997	51.5997	757	745	2230	2444	1209	1310	0.253432
RPS6A	13	33	786	861	4083	4481	0.0162703	0.0369128	0.840742	84.0742	0.843651	84.3651	0.842197	84.2197	173	115	1861	1242	2830	2285	0.0850541	0.0847458	0.62233	62.233	0.665891	66.5891	0.64411	64.411	252	233	2487	2311	881	839	0.0920044	0.0915881	0.278589	27.8589	0.283477	28.3477	0.281033	28.1033	268	285	2478	2617	498	448	0.0975965
RPS6B	179	265	944	1004	4751	4785	0.159394	0.208826	0.852493	85.2493	0.849206	84.9206	0.85085	85.085	1327	1038	2651	1868	2830	2272	0.333585	0.357192	0.561582	56.1582	0.591123	59.1123	0.576353	57.6353	1693	1509	3032	2669	1522	1371	0.358307	0.361178	0.373568	37.3568	0.378621	37.8621	0.376094	37.6094	1680	1685	2918	2938	1098	1106	0.365376
RPS7A	405	465	635	701	11102	10378	0.389423	0.398799	0.953171	95.3171	0.944753	94.4753	0.948962	94.8962	1704	1347	2147	1546	6619	5510	0.442482	0.465607	0.772347	77.2347	0.791286	79.1286	0.781817	78.1817	2803	2454	3368	2718	4035	3556	0.454221	0.474478	0.564623	56.4623	0.57833	57.833	0.571476	57.1476	2825	2951	3088	3065	2561	2719	0.477761
RPS7B	441	551	481	563	7636	7787	0.478308	0.494614	0.942964	94.2964	0.933238	93.3238	0.938101	93.8101	1589	1356	1937	1528	4028	3780	0.450652	0.47018	0.693506	69.3506	0.72315	72.315	0.708328	70.8328	2337	2065	3066	2691	1173	1066	0.432537	0.434188	0.298954	29.8954	0.305865	30.5865	0.302409	30.2409	2173	2344	2987	3246	410	539	0.421124
RPS8A	35	54	833	1010	2382	2572	0.0403226	0.0507519	0.748392	74.8392	0.727894	72.7894	0.738143	73.8143	395	310	2468	1776	1633	1303	0.137967	0.14861	0.428048	42.8048	0.455413	45.5413	0.441731	44.1731	477	456	3025	2878	910	912	0.136208	0.136773	0.253627	25.3627	0.26368	26.368	0.258654	25.8654	506	516	2922	3093	721	753	0.147608
RPS8B	59	122	873	955	2056	2272	0.0633047	0.113278	0.714517	71.4517	0.725267	72.5267	0.719892	71.9892	470	315	2270	1515	1244	1000	0.171533	0.172131	0.388114	38.8114	0.433192	43.3192	0.410653	41.0653	772	724	3315	2788	396	345	0.188892	0.20615	0.122576	12.2576	0.127424	12.7424	0.125	12.5	747	716	3061	3140	258	271	0.196166
RPS9A	355	417	495	601	690	761	0.417647	0.409627	0.612501	61.2501	0.591468	59.1468	0.601984	60.1984	869	670	1964	1439	356	363	0.306742	0.317686	0.179425	17.9425	0.233036	23.3036	0.20623	20.623	681	757	1291	1437	30	33	0.345335	0.345032	0.0270186	2.70186	0.0267125	2.67125	0.0268655	2.68655	708	662	708	662	0	0	0.5
RPS9B	338	439	1352	1448	5238	5333	0.2	0.232644	0.820078	82.0078	0.814663	81.4663	0.817371	81.7371	1439	1034	4448	3235	2862	2609	0.244437	0.242211	0.435319	43.5319	0.491254	49.1254	0.463287	46.3287	1695	1573	5666	5068	1245	1170	0.230268	0.236862	0.207617	20.7617	0.216259	21.6259	0.211938	21.1938	1712	1802	5484	5513	1080	1271	0.23791
RRT8	14	30	21	34	309	333	0.4	0.46875	0.944377	94.4377	0.912016	91.2016	0.928196	92.8196	194	159	228	181	44	73	0.459716	0.467647	0.171627	17.1627	0.299534	29.9534	0.235581	23.5581	278	222	305	262	8	6	0.476844	0.458678	0.0266555	2.66555	0.0240334	2.40334	0.0253445	2.53445	194	279	244	297	2	0	0.442922
RUB 1.00	16	55	36	86	458	542	0.307692	0.390071	0.938821	93.8821	0.880002	88.0002	0.909411	90.9411	469	274	548	329	167	98	0.46116	0.454395	0.246106	24.6106	0.243776	24.3776	0.244941	24.4941	481	428	537	490	16	14	0.472495	0.466231	0.030387	3.0387	0.0294679	2.94679	0.0299275	2.99275	508	441	576	504	6	8	0.468635
SAC6	57	58	92	106	3082	3607	0.38255	0.353659	0.975128	97.5128	0.975913	97.5913	0.975521	97.5521	602	444	647	485	1597	1361	0.481986	0.477933	0.718621	71.8621	0.74518	74.518	0.731901	73.1901	802	739	905	901	259	287	0.46983	0.45061	0.232161	23.2161	0.257399	25.7399	0.24478	24.478	670	775	778	968	71	112	0.462707
SAR 1.00	36	52	86	123	3165	3300	0.295082	0.297143	0.977985	97.7985	0.970045	97.0045	0.974015	97.4015	587	337	611	431	1084	1041	0.489983	0.438802	0.643996	64.3996	0.727589	72.7589	0.685793	68.5793	842	765	858	798	143	133	0.495294	0.489443	0.143997	14.3997	0.145379	14.5379	0.144688	14.4688	778	814	820	840	61	98	0.486859
SCS22	13	27	31	75	79	91	0.295455	0.264706	0.754668	75.4668	0.59363	59.363	0.674149	67.4149	93	57	163	113	10	3	0.363281	0.335294	0.0677643	6.77643	0.0308567	3.08567	0.0493105	4.93105	109	89	199	176	0	0	0.353896	0.335849	0	0	0	0	0	0	92	101	181	170	0	0	0.336996
SEC14	70	94	167	194	2922	3186	0.295359	0.326389	0.954793	95.4793	0.951795	95.1795	0.953294	95.3294	584	353	683	511	1394	1262	0.460931	0.408565	0.686237	68.6237	0.738683	73.8683	0.71246	71.246	925	845	963	907	249	285	0.489936	0.482306	0.208651	20.8651	0.245246	24.5246	0.226948	22.6948	861	894	863	943	165	215	0.49942
SEC17	8	6	42	60	1187	1136	0.16	0.0909091	0.97012	97.012	0.953748	95.3748	0.961934	96.1934	152	113	395	259	346	342	0.277879	0.303763	0.513753	51.3753	0.614389	61.4389	0.564071	56.4071	237	182	509	487	28	35	0.317694	0.272048	0.0621411	6.21411	0.079722	7.9722	0.0709316	7.09316	199	211	508	521	5	4	0.281471
SEC27	55	80	155	200	1924	2197	0.261905	0.285714	0.937252	93.7252	0.929863	92.9863	0.933557	93.3557	544	412	617	465	802	817	0.468562	0.469783	0.579147	57.9147	0.649908	64.9908	0.614527	61.4527	729	680	825	826	119	155	0.469112	0.451527	0.132374	13.2374	0.169385	16.9385	0.15088	15.088	643	746	800	845	43	48	0.445599
SFT1	158	196	229	220	817	806	0.408269	0.471154	0.803333	80.3333	0.794329	79.4329	0.798831	79.8831	436	287	477	324	180	166	0.477547	0.469722	0.282388	28.2388	0.351233	35.1233	0.316811	31.6811	523	457	578	493	36	34	0.475023	0.481053	0.0612376	6.12376	0.0667082	6.67082	0.0639729	6.39729	480	474	534	532	16	22	0.473373
SIM1	171	242	1791	2055	3177	3287	0.087156	0.105355	0.658199	65.8199	0.63813	63.813	0.648164	64.8164	906	737	2474	2077	1755	1761	0.268047	0.261905	0.460787	46.0787	0.505012	50.5012	0.482899	48.2899	1519	1515	3205	3059	465	446	0.32155	0.33122	0.148664	14.8664	0.148985	14.8985	0.148824	14.8824	1357	1589	2889	3415	173	193	0.319595
SMD2	11	20	22	32	129	175	0.333333	0.384615	0.875566	87.5566	0.86469	86.469	0.870128	87.0128	227	128	229	140	85	76	0.497807	0.477612	0.271562	27.1562	0.361442	36.1442	0.316502	31.6502	332	291	334	297	8	16	0.498498	0.494898	0.0234602	2.34602	0.0516078	5.16078	0.037534	3.7534	305	297	320	297	0	0	0.488
SNC1	31	42	47	52	951	1308	0.397436	0.446809	0.959016	95.9016	0.964935	96.4935	0.961976	96.1976	815	556	834	570	243	256	0.494239	0.493783	0.227611	22.7611	0.312543	31.2543	0.270077	27.0077	1084	945	1099	1035	22	40	0.496564	0.477273	0.0197566	1.97566	0.038758	3.8758	0.0292573	2.92573	1006	1008	1053	1011	15	27	0.488587
SNR17A	87	139	941	1226	523	615	0.0846304	0.101832	0.375792	37.5792	0.355428	35.5428	0.36561	36.561	695	537	5938	4190	520	436	0.104779	0.113603	0.0880067	8.80067	0.103538	10.3538	0.0957724	9.57724	889	872	7583	7226	505	443	0.104934	0.107681	0.0683766	6.83766	0.0634235	6.34235	0.0659	6.59	907	827	7556	7097	484	419	0.107172
SNR17B	54	75	367	482	249	286	0.128266	0.13465	0.432402	43.2402	0.401011	40.1011	0.416707	41.6707	426	313	3124	2033	197	194	0.12	0.133419	0.0657271	6.57271	0.0971204	9.71204	0.0814238	8.14238	543	521	3643	3408	195	181	0.129718	0.132604	0.0567541	5.67541	0.0564536	5.64536	0.0566039	5.66039	572	511	3691	3202	212	157	0.134178
SPT14	51	75	126	144	238	238	0.288136	0.342466	0.695114	69.5114	0.664118	66.4118	0.679616	67.9616	255	199	294	222	27	45	0.464481	0.472684	0.0891427	8.91427	0.175693	17.5693	0.132418	13.2418	317	281	317	281	0	0	0.5	0.5	0	0	0	0	0	0	309	332	316	332	3	0	0.4944
SRB2	27	48	266	281	406	434	0.0921502	0.145897	0.624638	62.4638	0.637292	63.7292	0.630965	63.0965	182	151	511	382	74	84	0.262626	0.283302	0.148417	14.8417	0.209708	20.9708	0.179062	17.9062	282	230	673	609	21	14	0.295288	0.274136	0.0362981	3.62981	0.0269696	2.69696	0.0316339	3.16339	260	251	567	590	12	17	0.314389
SRC1	53	53	223	256	295	335	0.192029	0.171521	0.607802	60.7802	0.602322	60.2322	0.605062	60.5062	402	331	763	546	148	124	0.345064	0.377423	0.188192	18.8192	0.210578	21.0578	0.199385	19.9385	572	520	997	949	31	18	0.364563	0.353982	0.0355073	3.55073	0.0220821	2.20821	0.0287947	2.87947	492	574	902	964	12	6	0.352941
STO1	60	92	68	108	464	571	0.46875	0.46	0.878372	87.8372	0.850158	85.0158	0.864265	86.4265	391	317	526	366	214	210	0.42639	0.464129	0.313582	31.3582	0.37957	37.957	0.346576	34.6576	590	539	764	748	21	23	0.435746	0.418803	0.0296117	2.96117	0.0336518	3.36518	0.0316317	3.16317	536	577	755	760	3	0	0.415182
SUN4	171	212	210	281	4152	3997	0.448819	0.43002	0.955692	95.5692	0.940841	94.0841	0.948266	94.8266	1387	1103	1553	1362	1526	1635	0.471769	0.447465	0.50855	50.855	0.56749	56.749	0.53802	53.802	1741	1617	2029	2021	358	395	0.461804	0.444475	0.158829	15.8829	0.176621	17.6621	0.167725	16.7725	1533	1745	1899	2296	91	105	0.446678
TAF14	29	63	107	200	652	788	0.213235	0.239544	0.878271	87.8271	0.824973	82.4973	0.851622	85.1622	589	363	707	451	257	259	0.454475	0.445946	0.282302	28.2302	0.386131	38.6131	0.334217	33.4217	731	683	934	840	17	17	0.439039	0.448457	0.0197244	1.97244	0.0216122	2.16122	0.0206683	2.06683	688	737	840	802	3	8	0.450262
TAN1	21	47	60	101	754	938	0.259259	0.317568	0.937941	93.7941	0.917942	91.7942	0.927941	92.7941	215	123	313	193	231	201	0.407197	0.389241	0.458247	45.8247	0.548053	54.8053	0.50315	50.315	273	278	409	364	12	27	0.400293	0.433022	0.0327368	3.27368	0.0763229	7.63229	0.0545298	5.45298	287	278	396	396	8	10	0.420205
TEF4	325	371	634	827	9644	9227	0.338895	0.309683	0.947973	94.7973	0.930818	93.0818	0.939396	93.9396	3165	2396	4112	3178	5080	4842	0.434932	0.429853	0.57858	57.858	0.630152	63.0152	0.604366	60.4366	4310	3952	5903	5381	1423	1168	0.422011	0.423444	0.213865	21.3865	0.196504	19.6504	0.205184	20.5184	4027	4068	5733	5879	511	616	0.412602
TFC3	10	26	17	32	45	104	0.37037	0.448276	0.757481	75.7481	0.780135	78.0135	0.768808	76.8808	175	103	261	164	23	11	0.401376	0.385768	0.0921911	9.21911	0.0726225	7.26225	0.0824068	8.24068	219	205	342	315	0	0	0.390374	0.394231	0	0	0	0	0	0	168	192	292	303	0	0	0.365217
TMA20	19	10	115	133	1246	1350	0.141791	0.0699301	0.924752	92.4752	0.915628	91.5628	0.92019	92.019	230	142	447	275	508	405	0.339734	0.340528	0.576436	57.6436	0.638087	63.8087	0.607261	60.7261	319	315	577	503	40	45	0.356027	0.385086	0.0761694	7.61694	0.0946165	9.46165	0.085393	8.5393	350	359	517	530	9	20	0.403691
TUB1	20	50	103	113	2354	2659	0.162602	0.306748	0.963371	96.3371	0.96597	96.597	0.96467	96.467	313	237	351	274	1428	1219	0.471386	0.463796	0.810863	81.0863	0.825971	82.5971	0.818417	81.8417	527	473	671	642	396	393	0.4399	0.424215	0.394558	39.4558	0.407969	40.7969	0.401264	40.1264	504	514	701	716	201	248	0.418257
TUB3	19	25	64	85	645	753	0.228916	0.227273	0.923145	92.3145	0.913432	91.3432	0.918288	91.8288	303	245	334	246	470	340	0.475667	0.498982	0.595499	59.5499	0.580699	58.0699	0.588099	58.8099	428	443	438	448	142	133	0.494226	0.497194	0.246932	24.6932	0.229899	22.9899	0.238416	23.8416	416	456	442	482	50	39	0.484848
UBC12	2	6	57	108	89	112	0.0338983	0.0526316	0.617474	61.7474	0.521824	52.1824	0.569649	56.9649	66	25	113	99	56	53	0.368715	0.201613	0.369222	36.9222	0.386634	38.6634	0.377928	37.7928	60	50	120	92	0	7	0.333333	0.352113	0	0	0.0831243	8.31243	0.0415621	4.15621	56	60	82	93	0	0	0.405797
UBC13	29	69	158	222	1147	1294	0.15508	0.237113	0.892611	89.2611	0.874489	87.4489	0.88355	88.355	729	479	1112	737	489	369	0.39598	0.393914	0.337395	33.7395	0.367394	36.7394	0.352395	35.2395	1157	1005	1689	1368	84	76	0.406535	0.423515	0.0539595	5.39595	0.0589027	5.89027	0.0564311	5.64311	1059	1147	1450	1616	24	20	0.422081
UBC4	176	232	208	233	6865	6686	0.458333	0.498925	0.972609	97.2609	0.966394	96.6394	0.969502	96.9502	1523	992	1542	1016	4355	3561	0.4969	0.494024	0.739695	73.9695	0.780041	78.0041	0.759868	75.9868	2874	2387	3041	2563	1315	1147	0.485883	0.482222	0.307613	30.7613	0.316403	31.6403	0.312008	31.2008	2540	2754	2863	3100	428	471	0.470109
UBC5	12	12	57	53	190	231	0.173913	0.184615	0.794401	79.4401	0.835652	83.5652	0.815027	81.5027	91	62	101	80	81	84	0.473958	0.43662	0.456955	45.6955	0.537976	53.7976	0.497465	49.7465	157	115	158	115	10	13	0.498413	0.5	0.0597009	5.97009	0.101562	10.1562	0.0806317	8.06317	116	119	135	139	0	0	0.462151
UBC8	15	21	39	52	123	153	0.277778	0.287671	0.791845	79.1845	0.780285	78.0285	0.786065	78.6065	117	76	225	151	42	38	0.342105	0.334802	0.182567	18.2567	0.231863	23.1863	0.207215	20.7215	125	106	125	213	0	7	0.5	0.332288	0	0	0.0379517	3.79517	0.0189758	1.89758	109	118	109	118	0	0	0.5
UBC9	18	42	38	65	626	792	0.321429	0.392523	0.951988	95.1988	0.933993	93.3993	0.94299	94.299	200	136	220	142	230	231	0.47619	0.489209	0.522162	52.2162	0.624215	62.4215	0.573189	57.3189	259	237	274	283	28	33	0.485929	0.455769	0.0950083	9.50083	0.111851	11.1851	0.10343	10.343	233	269	267	299	9	22	0.466
URA2	259	402	775	1228	3966	4831	0.250484	0.246626	0.859977	85.9977	0.825066	82.5066	0.842522	84.2522	370	293	1936	1442	650	714	0.160451	0.168876	0.278404	27.8404	0.363922	36.3922	0.321163	32.1163	296	306	2161	2186	93	95	0.120472	0.122793	0.0458282	4.58282	0.0463381	4.63381	0.0460831	4.60831	251	276	1989	2173	48	67	0.112054
VMA10	11	18	47	71	404	473	0.189655	0.202247	0.909557	90.9557	0.886962	88.6962	0.898259	89.8259	184	119	425	278	279	231	0.302135	0.299748	0.442025	44.2025	0.500715	50.0715	0.47137	47.137	252	209	574	525	89	90	0.305085	0.284741	0.157588	15.7588	0.171421	17.1421	0.164505	16.4505	254	244	511	557	69	69	0.332026
VPS29	15	33	38	46	1093	1048	0.283019	0.417722	0.971996	97.1996	0.962731	96.2731	0.967363	96.7363	300	207	353	221	435	448	0.459418	0.483645	0.569632	56.9632	0.676503	67.6503	0.623068	62.3068	455	359	513	508	46	59	0.470041	0.414072	0.0865088	8.65088	0.116762	11.6762	0.101635	10.1635	390	423	570	602	13	16	0.40625
VPS75	3	4	30	31	205	318	0.0909091	0.114286	0.881548	88.1548	0.919303	91.9303	0.900425	90.0425	198	113	350	216	86	81	0.361314	0.343465	0.225674	22.5674	0.309606	30.9606	0.26764	26.764	261	234	457	418	5	15	0.36351	0.358896	0.0127958	1.27958	0.040876	4.0876	0.0268359	2.68359	257	240	257	411	0	3	0.5
YBL059W	76	88	77	89	137	167	0.496732	0.497175	0.641676	64.1676	0.653613	65.3613	0.647645	64.7645	486	313	506	318	19	24	0.489919	0.496038	0.0368788	3.68788	0.0706881	7.06881	0.0537834	5.37834	588	520	607	527	4	7	0.49205	0.496657	0.00664837	0.664837	0.0131945	1.31945	0.00992144	0.992144	507	520	507	527	0	3	0.5
YBR062C	58	101	80	106	115	157	0.42029	0.487923	0.6191	61.91	0.602547	60.2547	0.610824	61.0824	317	202	342	203	35	40	0.481032	0.498765	0.0958972	9.58972	0.164948	16.4948	0.130422	13.0422	407	365	413	408	5	4	0.496341	0.472186	0.0120476	1.20476	0.010212	1.0212	0.0111298	1.11298	417	383	418	408	0	0	0.499401
YBR090C	15	35	404	446	729	759	0.0357995	0.0727651	0.651431	65.1431	0.645906	64.5906	0.648669	64.8669	315	212	1726	1128	439	341	0.154336	0.158209	0.225448	22.5448	0.257537	25.7537	0.241493	24.1493	458	444	2540	2159	90	94	0.152769	0.170572	0.0389284	3.89284	0.0479477	4.79477	0.0434381	4.34381	481	468	2215	2225	12	11	0.178412
YBR255C-A	34	69	103	146	393	422	0.248175	0.32093	0.820672	82.0672	0.776751	77.6751	0.798712	79.8712	159	112	196	135	50	48	0.447887	0.453441	0.217933	21.7933	0.278147	27.8147	0.24804	24.804	196	152	208	198	9	9	0.485149	0.434286	0.042618	4.2618	0.0481225	4.81225	0.0453702	4.53702	178	153	199	153	3	0	0.472149
YCL002C	53	41	182	173	225	192	0.225532	0.191589	0.595386	59.5386	0.565187	56.5187	0.580287	58.0287	292	178	432	266	19	13	0.403315	0.400901	0.0481578	4.81578	0.0533397	5.33397	0.0507488	5.07488	262	252	462	399	6	6	0.361878	0.387097	0.0151659	1.51659	0.0172366	1.72366	0.0162012	1.62012	246	260	246	382	0	4	0.5
YCL012C	9	19	12	26	271	317	0.428571	0.422222	0.961968	96.1968	0.932231	93.2231	0.947099	94.7099	145	75	186	100	144	117	0.438066	0.428571	0.46148	46.148	0.567175	56.7175	0.514327	51.4327	202	178	269	219	14	38	0.428875	0.448363	0.0550606	5.50606	0.159251	15.9251	0.107156	10.7156	180	180	247	250	3	5	0.421546
YDL012C	175	207	202	304	422	689	0.464191	0.405088	0.690144	69.0144	0.722445	72.2445	0.706294	70.6294	768	523	871	618	105	82	0.468578	0.45837	0.113179	11.3179	0.124913	12.4913	0.119046	11.9046	889	846	1042	986	6	14	0.460383	0.46179	0.00613772	0.613772	0.0149677	1.49677	0.0105527	1.05527	842	857	921	976	2	5	0.477595
YDR381C-A	44	73	103	134	17	26	0.29932	0.352657	0.166113	16.6113	0.187742	18.7742	0.176927	17.6927	141	111	243	164	5	0	0.367188	0.403636	0.0237477	2.37477	0	0	0.0118738	1.18738	157	116	283	218	0	0	0.356818	0.347305	0	0	0	0	0	0	147	126	228	214	0	0	0.392
YFR045W	45	68	87	140	198	226	0.340909	0.326923	0.731486	73.1486	0.659928	65.9928	0.695707	69.5707	212	143	303	196	28	34	0.41165	0.421829	0.0953874	9.53874	0.163743	16.3743	0.129565	12.9565	255	224	378	342	7	0	0.402844	0.39576	0.0208675	2.08675	0	0	0.0104337	1.04337	253	233	356	355	0	0	0.415435
YHR097C	14	14	22	45	171	216	0.388889	0.237288	0.900527	90.0527	0.851587	85.1587	0.876057	87.6057	203	148	324	204	82	103	0.385199	0.420455	0.228164	22.8164	0.363374	36.3374	0.295769	29.5769	258	268	386	343	19	21	0.400621	0.438625	0.0537147	5.37147	0.0634244	6.34244	0.0585695	5.85695	224	288	306	381	0	6	0.422642
YIL156W-B	19	18	78	87	91	135	0.195876	0.171429	0.577986	57.7986	0.642333	64.2333	0.610159	61.0159	112	65	337	211	22	29	0.249443	0.235507	0.0726372	7.26372	0.14104	14.104	0.106838	10.6838	97	103	320	103	3	0	0.232614	0.5	0.0110649	1.10649	0	0	0.00553246	0.553246	120	100	120	100	0	0	0.5
YIP3	52	73	94	116	2388	2396	0.356164	0.386243	0.967961	96.7961	0.96017	96.017	0.964066	96.4066	553	400	601	408	783	699	0.479203	0.49505	0.575313	57.5313	0.633703	63.3703	0.604508	60.4508	939	729	998	790	60	78	0.48477	0.479921	0.0582865	5.82865	0.0929983	9.29983	0.0756424	7.56424	739	816	876	888	23	21	0.457585
YKR005C	59	60	78	78	12	13	0.430657	0.434783	0.146668	14.6668	0.156299	15.6299	0.151483	15.1483	111	67	138	67	2	0	0.445783	0.5	0.0156294	1.56294	0	0	0.00781471	0.781471	107	121	107	121	0	0	0.5	0.5	0	0	0	0	0	0	114	122	114	122	0	0	0.5
YLR049C	695	787	854	803	0	0	0.448677	0.494969	0	0	0	0	0	0	914	675	1022	904	0	0	0.472107	0.427486	0	0	0	0	0	0	954	864	1115	1035	0	0	0.461092	0.454976	0	0	0	0	0	0	774	911	913	1023	0	0	0.458803
YLR173W	280	282	280	282	0	0	0.5	0.5	0	0	0	0	0	0	397	356	408	356	0	0	0.493168	0.5	0	0	0	0	0	0	469	420	498	420	0	0	0.485005	0.5	0	0	0	0	0	0	357	461	357	461	0	0	0.5
YLR202C	103	85	1033	1118	0	0	0.090669	0.0706567	0	0	0	0	0	0	163	91	1309	1058	0	0	0.110734	0.0791993	0	0	0	0	0	0	196	173	1412	1316	0	0	0.121891	0.116185	0	0	0	0	0	0	169	200	1289	1332	0	0	0.115912
YLR426W	34	67	45	71	442	362	0.43038	0.485507	0.916507	91.6507	0.839794	83.9794	0.878151	87.8151	150	118	205	146	43	42	0.422535	0.44697	0.191315	19.1315	0.239337	23.9337	0.215326	21.5326	186	161	201	207	12	10	0.48062	0.4375	0.0583117	5.83117	0.0507937	5.07937	0.0545527	5.45527	172	162	230	193	5	13	0.427861
YML053C	270	358	505	589	0	0	0.348387	0.378036	0	0	0	0	0	0	345	252	548	470	0	0	0.386338	0.34903	0	0	0	0	0	0	334	322	608	515	0	0	0.354565	0.384707	0	0	0	0	0	0	307	364	453	512	0	0	0.403947
YML6	11	20	30	64	309	450	0.268293	0.238095	0.92542	92.542	0.893702	89.3702	0.909561	90.9561	242	133	455	290	84	82	0.347202	0.314421	0.180627	18.0627	0.254156	25.4156	0.217392	21.7392	279	253	571	468	8	11	0.328235	0.350902	0.0165578	1.65578	0.0272577	2.72577	0.0219077	2.19077	228	245	443	489	5	5	0.339791
YOP1	63	116	128	145	3785	3486	0.329843	0.444444	0.972618	97.2618	0.963486	96.3486	0.968052	96.8052	636	478	946	623	1378	1384	0.402023	0.434151	0.626542	62.6542	0.711917	71.1917	0.669229	66.9229	743	690	1191	1117	324	340	0.384178	0.381848	0.241271	24.1271	0.262761	26.2761	0.252016	25.2016	682	897	1117	1275	118	193	0.379099
YPL109C	26	19	27	34	164	169	0.490566	0.358491	0.86085	86.085	0.855165	85.5165	0.858007	85.8007	102	92	124	93	27	22	0.451327	0.497297	0.191393	19.1393	0.192135	19.2135	0.191764	19.1764	98	99	123	124	3	6	0.443439	0.443946	0.0261065	2.61065	0.050462	5.0462	0.0382842	3.82842	86	89	86	89	0	0	0.5
YPR010C-A	17	31	98	134	700	911	0.147826	0.187879	0.890556	89.0556	0.888219	88.8219	0.889387	88.9387	121	91	299	206	359	297	0.288095	0.306397	0.591707	59.1707	0.634935	63.4935	0.613321	61.3321	166	126	393	289	37	52	0.296959	0.303614	0.102044	10.2044	0.178381	17.8381	0.140212	14.0212	132	172	295	346	8	10	0.309133
YPR063C	14	34	192	220	1653	1721	0.0679612	0.133858	0.901848	90.1848	0.898177	89.8177	0.900013	90.0013	351	203	456	315	700	585	0.434944	0.391892	0.630443	63.0443	0.683325	68.3325	0.656884	65.6884	490	465	593	565	89	114	0.452447	0.451456	0.14007	14.007	0.179852	17.9852	0.159961	15.9961	494	472	582	619	42	50	0.459108
YPR098C	22	25	51	76	928	972	0.30137	0.247525	0.956444	95.6444	0.938789	93.8789	0.947617	94.7617	161	127	195	129	167	175	0.452247	0.496094	0.481791	48.1791	0.577543	57.7543	0.529667	52.9667	195	169	221	192	54	32	0.46875	0.468144	0.20547	20.547	0.150071	15.0071	0.17777	17.777	129	171	164	207	28	38	0.440273
YPR153W	55	92	97	146	171	234	0.361842	0.386555	0.676417	67.6417	0.651582	65.1582	0.663999	66.3999	306	192	373	269	25	26	0.450663	0.416486	0.0679707	6.79707	0.0988854	9.88854	0.0834281	8.34281	347	337	446	388	5	5	0.437579	0.464828	0.0122645	1.22645	0.0135394	1.35394	0.0129019	1.29019	343	350	400	429	5	7	0.461642
YPR170W-B	55	80	159	247	2709	2723	0.257009	0.244648	0.953447	95.3447	0.929623	92.9623	0.941535	94.1535	901	564	1414	943	1544	1289	0.389201	0.374253	0.559757	55.9757	0.6167	61.67	0.588228	58.8228	1644	1371	2524	2074	354	319	0.394434	0.397968	0.139871	13.9871	0.150954	15.0954	0.145413	14.5413	1556	1624	2245	2195	120	125	0.409366
YRA1	444	495	962	1146	3621	3507	0.315789	0.301645	0.819338	81.9338	0.786918	78.6918	0.803128	80.3128	623	502	1391	1098	1494	1403	0.309335	0.31375	0.564321	56.4321	0.606308	60.6308	0.585314	58.5314	693	582	1424	1314	168	161	0.32735	0.306962	0.124195	12.4195	0.128769	12.8769	0.126482	12.6482	595	658	1135	1336	15	25	0.343931
YSC84	20	27	22	48	412	563	0.47619	0.36	0.951397	95.1397	0.932984	93.2984	0.94219	94.219	224	151	245	186	196	211	0.477612	0.448071	0.454788	45.4788	0.553345	55.3345	0.504066	50.4066	262	309	339	327	24	45	0.43594	0.485849	0.0728525	7.28525	0.12388	12.388	0.0983663	9.83663	270	331	274	359	2	6	0.496324
YSF3	4	12	60	77	20	16	0.0625	0.134831	0.261438	26.1438	0.189943	18.9943	0.22569	22.569	126	79	347	228	14	6	0.266385	0.257329	0.0463378	4.63378	0.0306658	3.06658	0.0385018	3.85018	159	136	159	136	0	0	0.5	0.5	0	0	0	0	0	0	143	134	143	134	0	0	0.5
Legend
25	Humanized yeast hsh155-ds incubated with 0 uM Pladienolide-B Trail 1
26	Humanized yeast hsh155-ds incubated with 5 uM Pladienolide-B Trial 1
27	Humanized yeast hsh155-ds incubated with 0.5 uM Pladienolide-B Trial 1
28	Humanized yeast hsh155-ds incubated with 5 uM Thailanstatin-A Trial 1
29	WT Hsh155 yeast incubated with 0 uM Pladienolide-B Trial 1
30	WT Hsh155 yeast incubated with 5 uM Pladienolide-B Trial 1
31	Humanized yeast hsh155-ds incubated with 0 uM Pladienolide-B Trail 2
32	Humanized yeast hsh155-ds incubated with 5 uM Pladienolide-B Trial 2
33	Humanized yeast hsh155-ds incubated with 0.5 uM Pladienolide-B Trial 2
34	Humanized yeast hsh155-ds incubated with 5 uM Thailanstatin-A Trial 2
35	WT Hsh155 yeast incubated with 0 uM Pladienolide-B Trial 2
36	WT Hsh155 yeast incubated with 5 uM Pladienolide-B Trial 2
SE	Splicing Efficiency
ijc_min	(integer) minimum read count of all junctions in the included form
ejc	(integer) minimum read count of all junctions in the excluded (skipped) form
ijc_max	(float) included form junction count corresponding to the max_psi calculation
[truncated: 35 more columns]
